# Supplementary material for: Aromatic fused heterocyclic [22] macrocycles with NIR absorption
Source: Royal Society of Chemistry journal article supplement (doi:10.1039/c4cc02749c), 2014-05-22
Supplement: c4cc02749c1.pdf [file c4cc02749c1.pdf]

## Supporting Information

# Aromatic Fused Heterocyclic [22] Macrocycles with NIR Absorption

Harapriya Rath,<sup>\*a</sup> Abhijit Mallick<sup>a</sup>, Tubai Ghosh<sup>a</sup> and Alok Kalita<sup>b</sup>

<sup>a</sup> *Department of Inorganic Chemistry, Indian Association for The Cultivation of Science, 2A/2B Raja S. C. Mullick Road, Jadavpur, Kolkata 700 032, India*

<sup>b</sup> *Department of Chemistry, Indian Institute of Technology, Bombay, Mumbai 400 076, India*

E-mail: ichr@iacs.res.in

### Table of Contents

|                                                         |    |
|---------------------------------------------------------|----|
| Instrumentation and Materials.....                      | S2 |
| General Synthetic Procedure and Spectroscopic Data..... | S4 |

## Instrumentation and Materials

**1.1** Electronic absorption spectra were measured with a PerkinElmer Lambda 950 UV-visible-NIR spectrophotometer, and variable temperature UV-vis NIR spectroscopic study was carried out in Unisoku Scientific cryostat.  $^1\text{H}$  NMR spectra were recorded on a Bruker AVIII 500 MHz spectrometer, Bruker AVIII 400 MHz, Bruker DPX-300 MHz spectrometer and chemical shifts were reported as the delta scale in ppm relative to  $\text{CHCl}_3$  ( $\delta = 7.26$  ppm) as internal reference for  $^1\text{H}$ . MALDI-TOF MS data were recorded using Bruker Daltonics flex Analyser and ESI HR-MS data were recorded using Waters QTOF Micro YA263 spectrometer. Cyclic voltammograms were recorded using a platinum working electrode, a platinum wire counter electrode and an Ag/AgCl reference electrode in Bioanalytical Systems EC epsilon. The measurements were carried out in  $\text{CH}_2\text{Cl}_2$  solution using 0.1 M  $\text{Bu}_4\text{NPF}_6$  as the supporting electrolyte at a scan rate of 0.1 V/s. Peak potentials were determined from differential pulse voltammetry experiments. The  $\text{Fc}/\text{Fc}^+$  redox couple was used as an internal standard. All solvents and chemicals were of reagent grade quality, obtained commercially and used without further purification except as noted. For spectral measurements, anhydrous dichloromethane was obtained by refluxing and distillation over  $\text{CaH}_2$ . Dry THF was obtained by refluxing and distillation over pressed Sodium metal. Thin layer chromatography (TLC) was carried out on alumina sheets coated with silica gel 60 F<sub>254</sub> (Merck 5554) and gravity column chromatography were performed using Merck Silica Gel 230-400 mesh. Aluminum Oxide (Basic) grade II was purchased from Sigma Aldrich.

### **1.2 X-ray Structure Determination**

A suitable shining blue crystal of size 0.01 x 0.07 x 0.15 mm<sup>3</sup> was mounted on a Rigaku Saturn 724 CCD diffractometer with a fine-focus sealed tube Mo-K $\alpha$  ( $\lambda = 0.71075\text{\AA}$ ) X-ray source. Total 800 frames were collected at 150K with the exposure time of 16s per frame. Unit cell determination using both high angle and low angle diffraction reveal that compound crystallizes in triclinic  $P - 1$  space group. Data integration and indexing of **6** was done by using crystal clear. All calculations were carried out using the programs in WinGX module<sup>1</sup> and solved by direct methods (SIR-92).<sup>2</sup> The final refinement of the structure was carried out using least-squares method on  $F^2$  using SHELX-97.<sup>3</sup> The final refinement of the solved structure converged at the R value of 0.0843 ( $I > 2\sigma(I)$ ). All non-hydrogen atoms were refined anisotropically. All the hydrogen atoms were located from difference Fourier maps.

### **1.3 Theoretical Calculation**

Quantum mechanical calculations were carried out on Gaussian 09W<sup>4</sup> program suite to estimate the

NICS (0) values at the center of the molecular plane of all the two macrocycles. Density functional theory (DFT) with Becke's three-parameter hybrid exchange functional and the Lee-Yang-Parr correlation functional (B3LYP) and 6-31G (d) basis set for all the atoms employed in the calculations (SI). The molecular structure obtained from single crystal analysis was used to obtain the geometry optimized structures of **6**. For macrocycle **5** and **7**, since there is no crystal structure available, the molecules were drawn in Gauss View using the default parameters for bond lengths, angles and dihedrals. This initial structure was then subjected to complete geometry optimization based on the DFT-formalism. We have used the B3LYP/6-31G\* level of theory to get the minimum energy structure.

#### References:

1. L. J. Farrugia, WinGX, Version 1.64.05 *J. Appl. Crystallogr.*, 1999, **32**, 837.
2. A. Altomare, G. Cascarano, C. Giacovazzo and A. Gualardi, *J. Appl. Crystallogr.*, 1993, **26**, 343.
3. S3. G. M. Sheldrick, SHELXL-97, Program for Structure Refinement, University of Göttingen: Germany, 1997.
4. Gaussian 09, Revision B. 01, M. J. Frisch, G. W. Trucks, H. B. Schlegel, W. H. G. E. Scuseria, M. A. Robb, J. R. Cheeseman, G. Scalmani, V. Barone, B. Mennucci, G. A. Petersson, H. Nakatsuji, M. Caricato, X. Li, H. P. Hratchian, A. F. Izmaylov, J. Bloino, G. Zheng, J. L. Sonnenberg, M. Hada, M. Ehara, K. Toyota, R. Fukuda, J. Hasegawa, M. Ishida, T. Nakajima, Y. Honda, O. Kitao, H. Nakai, T. Vreven, J. A. Montgomery, J. E. Jr. Peralta, F. Ogliaro, M. Bearpark, J. J. Heyd, E. Brothers, K. N. Kudin, V. N. Steroverov, T. Keith, R. Kobayashi, J. Normand, K. Raghavachari, A. Rendell, J. C. Burant, S. S. Iyengar, J. Tomasi, M. Cossi, N. Rega, J. M. Millan, M. Klene, J. E. Knox, J. B. Cross, V. Bakken, C. Adamo, J. Jaramillo, R. Gomperts, R. E. Stratmann, O. Yazyev, A. J. Austin, R. Cammi, C. Pomelli, J. W. Ochterski, R. L. Martin, K. Morokuma, V. G. Zakrzewski, G. A. Voth, P. Salvador, J. J. Dannenberg, S. Dapprich, A. D. Daniels, O. Farkas, J. B. Foresman, J. V. Ortiz, J. Cioslowski, D. J. Fox, Gaussian, Incl., Wallingford CT, 2010

## General Synthetic Procedure

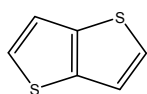

**Thieno[3,2-b]thiophene (1):** This was synthesized as reported in literature. Yield: 60%.  $^1\text{H NMR}$  (300 MHz,  $\text{CDCl}_3$ ):  $\delta$  [ppm]: 7.268-7.284 (d, 1H,  $J=4.8\text{Hz}$ ); 7.387-7.404 (d, 1H,  $J=5\text{Hz}$ ).  $^{13}\text{C NMR}$  (75 MHz,  $\text{CDCl}_3$ , 300K,  $\delta$  [ppm]): 119.65, 127.62, 139.73. **HRMS (m/z):** 162.90  $[\text{M}+\text{Na}]^+$  (140.23 calc. for  $\text{C}_6\text{H}_4\text{S}_2$ ).

**2,5-Bis(tolylhydroxymethyl)-thieno[3,2-b]thiophene (2):** To a 250mL round-bottomed flask equipped with a magnetic bar, Thieno[3,2-b]thiophene **1** (1gm, 7.13mmol) was placed followed by dry THF (40mL). The reaction mixture was stirred under inert atmosphere. N, N, N', N'-Tetramethyl ethylenediamine (3.2mL, 0.021mol) was added followed by stirring for half an hour at room temperature.

Afterward n-BuLi in hexane (1.6M) (13.04mL, 0.021mol) was added through rubber septa drop wise, yellow turbidity started forming. The reaction mixture was stirred at room temperature for 2hrs and then heated to 66°C for 1hour. The reaction mixture was brought room temperature after which it was brought to ice cold temperature. At ice cold temperature,

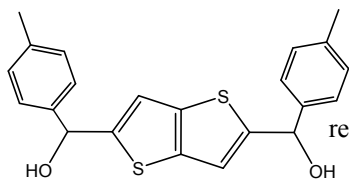

Tolylaldehyde (2mL, 0.017mol) in dry THF (40mL) was then added drop wise to the reaction mixture, the reaction mixture was stirred for 2 hours. The reaction mixture was quenched by saturated  $\text{NH}_4\text{Cl}$  (aq) solution, product was extracted by diethyl ether, dried over  $\text{Na}_2\text{SO}_4$ . The crude product was precipitate out by hexane and purified by silicagel column chromatography using hexane-ethyl acetate (1:0.4) solution. The solvent was evaporated and light yellow solid was obtained.

Yield 2.09gm (77.5%).  $^1\text{H NMR}$  (500MHz,  $\text{CDCl}_3$ , 300K,  $\delta$  [ppm]): 2.353(s, 3H); 6.026(s, 1H); 6.979(s, 1H); 7.170-7.186(d, 1H,  $^3J=8\text{Hz}$ ); 7.330-7.346(d, 1H,  $^3J=8\text{Hz}$ ).  $^{13}\text{C NMR}$  (125 MHz,  $\text{CDCl}_3$ , 300K,  $\delta$  [ppm]): 21.10, 81.714, 117.92, 126.82, 129.19, 137.78, 137.88, 138.205, 148.05. **HRMS (m/z)** 380.593  $[\text{M}^+]$  (380.52 calc. for  $\text{C}_{22}\text{H}_{20}\text{O}_2\text{S}_2$ ).

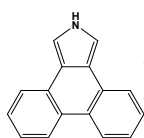

**Phenanthrene-fused Pyrrole (3):** Following the literature reported method, compound **3** was obtained in 85% yield.  $^1\text{H NMR}$  (300MHz,  $\text{CDCl}_3$ , 300K,  $\delta$  [ppm]): 7.433-7.481 (m, 4H); 7.579-7.588 (d, 2H,  $J=2.7\text{Hz}$ ); 8.047-8.066 (d, 2H,  $J=5.7\text{Hz}$ ); 8.445-8.472 (d, 2H,  $J=8.1\text{Hz}$ ); 8.948 (brs, 1H).  $^{13}\text{C NMR}$  (75MHz,  $\text{CDCl}_3$ , 300K,  $\delta$  [ppm]): 110.27, 119.80, 123.24, 123.54, 125.04, 126.88, 128.81, 129.46. **HRMS (m/z):** 217.83  $[\text{M}^+]$  (217.27 calc. for  $\text{C}_{16}\text{H}_{11}\text{N}$ ).

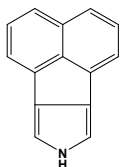

**Acenaphthylene-fused Pyrrole (4):** Following literature reported method, compound **4** was obtained in 91% yield.  $^1\text{H NMR}$  (500 MHz,  $\text{CDCl}_3$ , 300K,  $\delta$  [ppm]): 7.011-7.015 (d, 1H,

$^3J=2\text{Hz}$ ); 7.473-7.502 (t, 1H,  $^3J=7.5\text{Hz}$ ); 7.568-7.582 (d, 1H,  $^3J=7\text{Hz}$ ); 7.614-7.630 (d, 1H,  $^3J=8\text{Hz}$ ); 8.139 (brs, 1H).  $^{13}\text{C}$  NMR (125 MHz,  $\text{CDCl}_3$ , 300K,  $\delta$  [ppm]): 110.74, 118.64, 124.71, 127.71, 128.85, 131.03, 133.87, 137.89. HRMS (m/z): 208.07 [ $\text{M}+\text{H}_2\text{O}$ ] $^+$  (191.25 calc. for  $\text{C}_{14}\text{H}_9\text{N}$ ).

**General synthetic procedure of Compound 5, 6 and 7:** Under nitrogen atmosphere and in dark condition a solution of 380mg of compound **2** (1mmol) and 69 $\mu\text{L}$  pyrrole /217mg compound **3**/191mg **4** (1mmol) in 250 mL dry dichloromethane was stirred for 30 minutes. Afterward, catalytic amount of  $\text{BF}_3\text{-Et}_2\text{O}$  (0.10mL) was added to the reaction mixture and stirred at RT for 90 minutes. Then 2.5 equivalents DDQ (567mg, 2.5 mmol) was added and opened to air and the mixture was stirred for another 1 hour. The solvent was removed under reduced pressure and compound was filtered by basic alumina followed by repeated silica gel column chromatography with the mixture of 5% methanol-dichloromethane solution. After recrystallization, the title compound was yielded as dark green crystal.

**Compound 5:** Yield.48mg (~5%).  $^1\text{H}$  NMR (500 MHz,  $\text{CDCl}_3$ ,  $-40^\circ\text{C}$ ,  $\delta$  [ppm], TMS): -2.1 (brs, 1H, NH); -0.074 (s, 1H, Inner  $\beta$ -H of Thienothiophene); 2.761 (s, 3H, methyl); 7.851-7.895 (2H, tolyl CH); 8.975 (s, 1H); 9.264 (s, pyrrole  $\beta$ -H); 9.278 (brs, 2H, tolyl CH). MALDI-TOF MS (m/z): 816.10 (Calc. for  $\text{C}_{52}\text{H}_{36}\text{N}_2\text{S}_4$  exact mass: 816.18). UV-VIS ( $\text{CH}_2\text{Cl}_2$ ,  $\lambda$  [nm], ( $\epsilon$  [ $\text{M}^{-1}\text{cm}^{-1}\times 10^3$ ]), 298K): 503(68.73); 530 (50.67); 725 (22.33); 868 (9.22); 957 (5.33). [(UV-VIS [ $\text{CH}_2\text{Cl}_2$ , 1% TFA/ $\text{CH}_2\text{Cl}_2$ ,  $\lambda$  [nm], ( $\epsilon$  [ $\text{M}^{-1}\text{cm}^{-1}\times 10^3$ ]), 298K): 509 (93.98); 540 (67.76); 867 (57.6).

**Compound 6:** Yield.95mg (~8%).  $^1\text{H}$  NMR (500 MHz,  $\text{CDCl}_3$ ,  $-40^\circ\text{C}$ ,  $\delta$  [ppm], TMS): -1.543 (brs, 1H); 0.721 (s, 1H), 2.632 (s, 6 H); 7.439-7.445 (br, 2H); 7.488-7.503 (d, 2H,  $J=7.5\text{Hz}$ ); 7.521-7.536 (d, 2H,  $J=7.5\text{Hz}$ ); 8.013-8.029 (d, 2H,  $J=8\text{Hz}$ ); 8.071-8.087 (d, 2H,  $J=8\text{Hz}$ ); 8.623-8.637 (d, 2H,  $J=7\text{Hz}$ ); 8.735 (s, 1H); 8.889-8.905 (d, 2H,  $J=8\text{Hz}$ ); 9.573-9.587 (d, 2H,  $J=7\text{Hz}$ ); 9.616-9.631 (d, 2H,  $J=7.5\text{Hz}$ ). MALDI-TOF MS (m/z): 1117.278 (Calc. for  $\text{C}_{76}\text{H}_{48}\text{N}_2\text{S}_4$  exact mass: 1117.27). UV-VIS ( $\text{CH}_2\text{Cl}_2$ ,  $\lambda$  [nm], ( $\epsilon$  [ $\text{M}^{-1}\text{cm}^{-1}\times 10^3$ ]), 298K): 557(60.13); 654(7.62); 716(8.53); 969(3.50). UV-VIS [ $\text{CH}_2\text{Cl}_2$ , 1% TFA/ $\text{CH}_2\text{Cl}_2$ ,  $\lambda$  [nm], ( $\epsilon$  [ $\text{M}^{-1}\text{cm}^{-1}\times 10^3$ ]), 298K): 584 (67.36); 806(16.14); 963(8.98).

**Compound 7.:** Yield.105mg (~10%)  $^1\text{H}$  NMR (500MHz,  $\text{CDCl}_3$ ,  $0^\circ\text{C}$ ,  $\delta$  [ppm], TMS): -2.028 (brs, 1H); 0.117 (s, 1H); 2.817(s, 3H); 2.831 (s, 3H); 6.593-6.610 (d, 2H,  $J=8.5\text{Hz}$ ); 6.855-6.869 (d, 1H,  $J=7\text{Hz}$ ); 6.982-6.996 (d, 1H,  $J=7\text{Hz}$ ); 7.070-7.091(d, 2H,  $J=8.5\text{Hz}$ ); 7.579-7.618(m, 2H); 8.068-8.083(d, 2H,  $J=7.5\text{Hz}$ ); 8.106-8.121(d, 1H,  $J=7.5\text{Hz}$ ); 8.166-8.199 (t, 1H,  $J=8.5\text{Hz}$ ); 9.055 (s, 1H); 9.303-9.318(d, 1H,  $J=7.5\text{Hz}$ ); 9.337-9.352 (d, 1H,  $J=7.5\text{Hz}$ ). MALDI-TOF MS (m/z): 1065.32 (Calc. for  $\text{C}_{72}\text{H}_{44}\text{N}_2\text{S}_4$  exact mass: 1065.24). UV-VIS ( $\text{CH}_2\text{Cl}_2$ ,  $\lambda$  [nm], ( $\epsilon$  [ $\text{M}^{-1}\text{cm}^{-1}\times 10^3$ ]), 298K): 559(68.80); 661(7.44); 725(8.88); 839(3.12); 939(3.20). UV-VIS [ $\text{CH}_2\text{Cl}_2$ , 1% TFA/ $\text{CH}_2\text{Cl}_2$ ,  $\lambda$  [nm], ( $\epsilon$  [ $\text{M}^{-1}\text{cm}^{-1}\times 10^3$ ]), 298K): 586(97.12); 850(20.08); 927(12.85).

## Supplementary Data

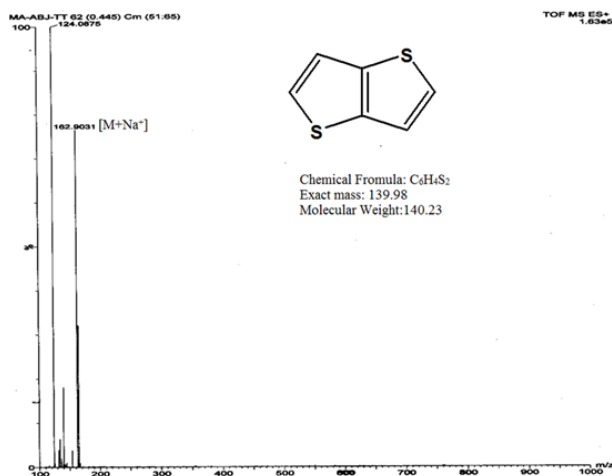

Figure S1. HRMS Spectra of 1

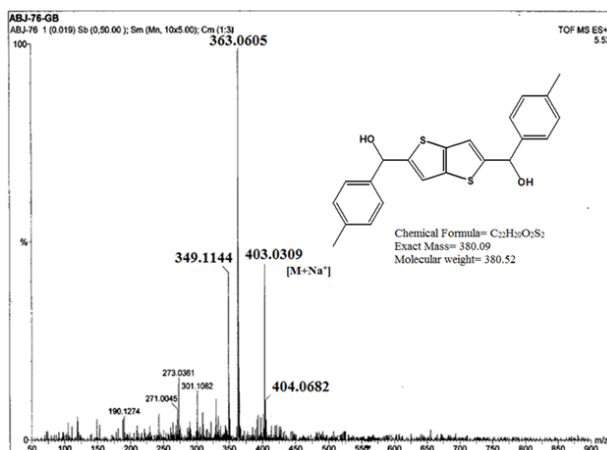

Figure S2. HRMS Spectra of 2

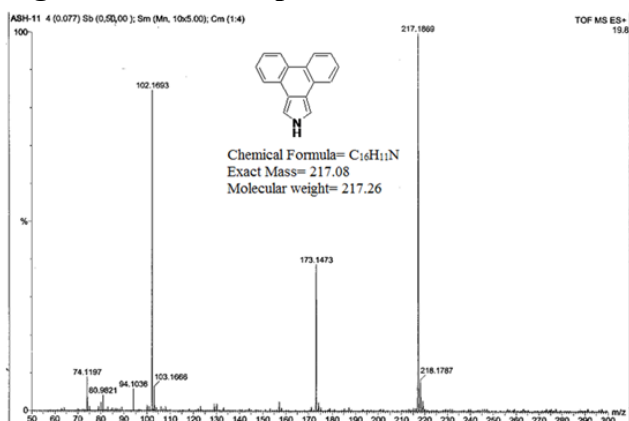

Figure S3. HRMS Spectra of 3

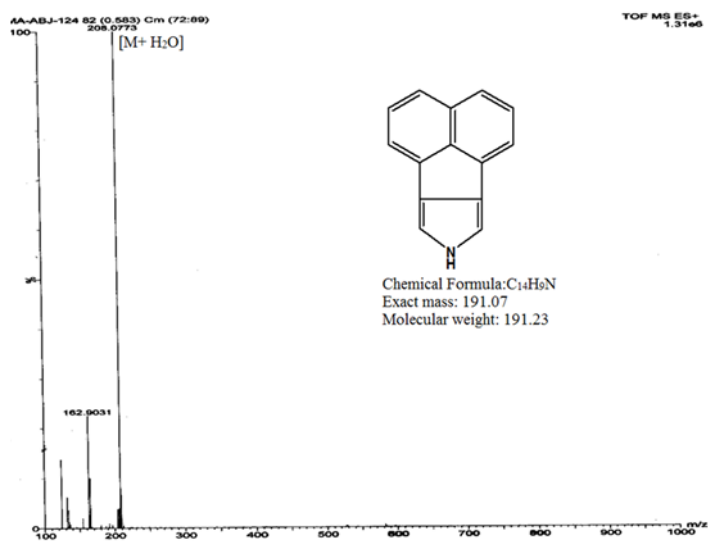

Figure S4. HRMS Spectra of 4

D:\User Data\Inorganic Chemistry\Harapriya Rath\ABJ-770\_A3(1)\SRRef  
D:\User Methods\RP\_50-1500\_Da.par

IACS-Kolkata

Comment 1  
Comment 2

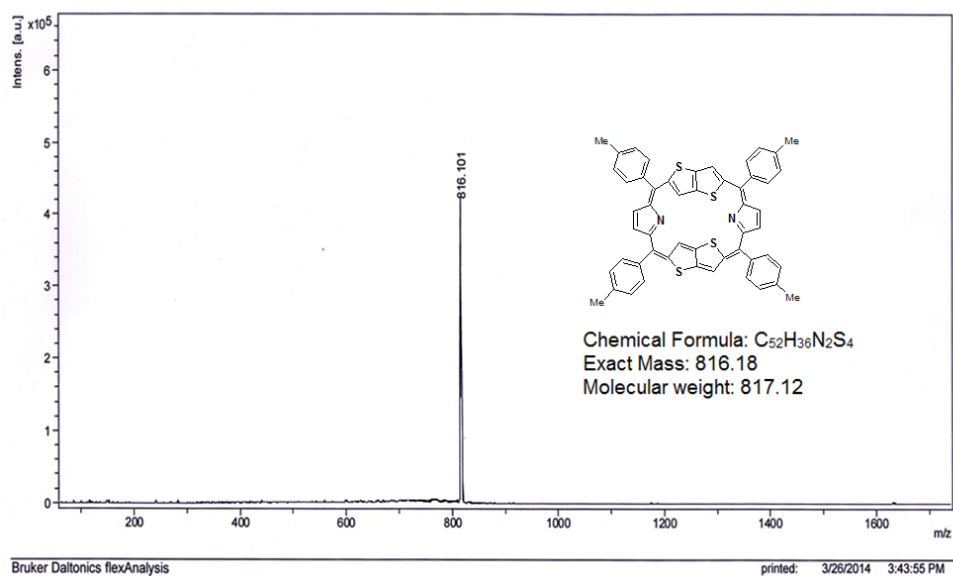

Figure S5. MALDI-TOF MS Spectra of 5

Comment 1 DMSO  
Comment 2 DITHRANOL

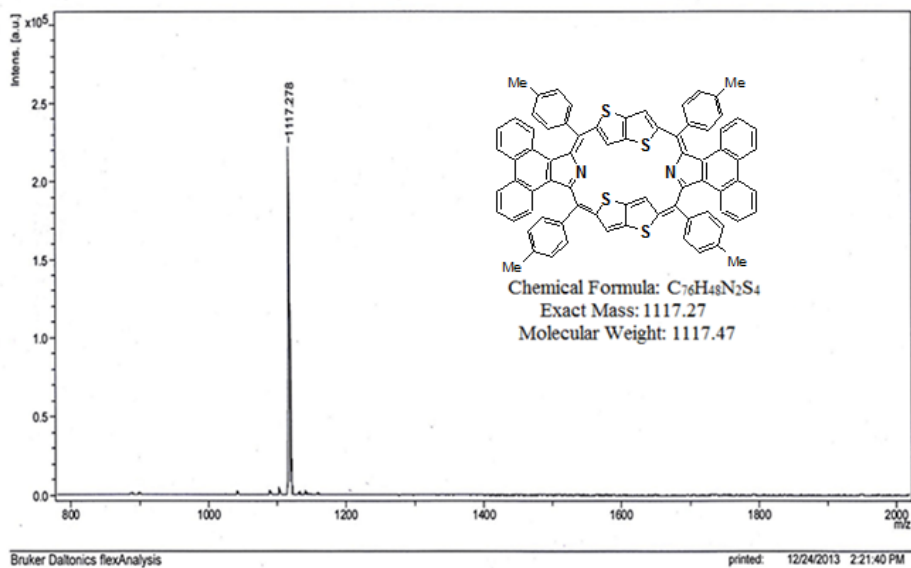

Figure S6. MALDI-TOF MS Spectra of 6

Comment 1 DMSO  
Comment 2 DITHRANOL

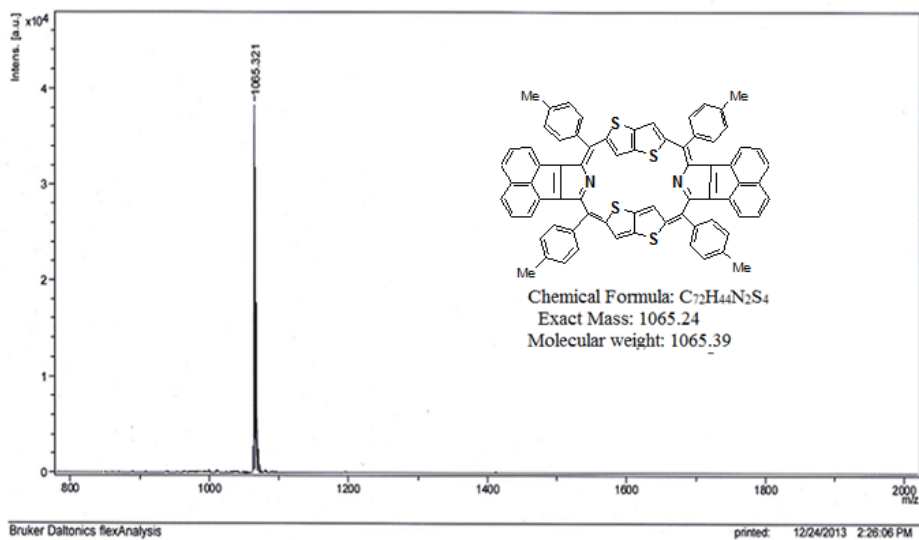

Figure S7. MALDI-TOF MS Spectra of 7



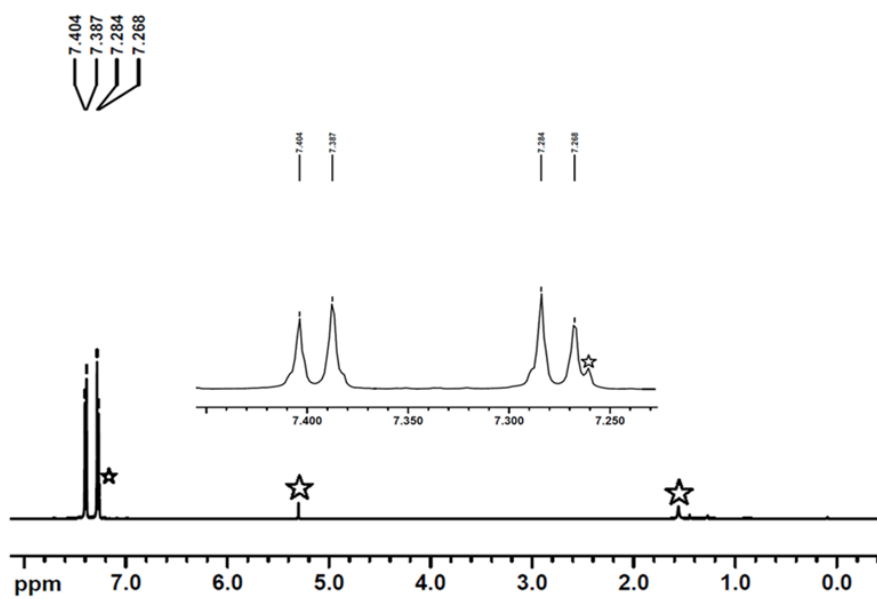

Figure S8.  $^1\text{H}$  NMR Spectrum of 1

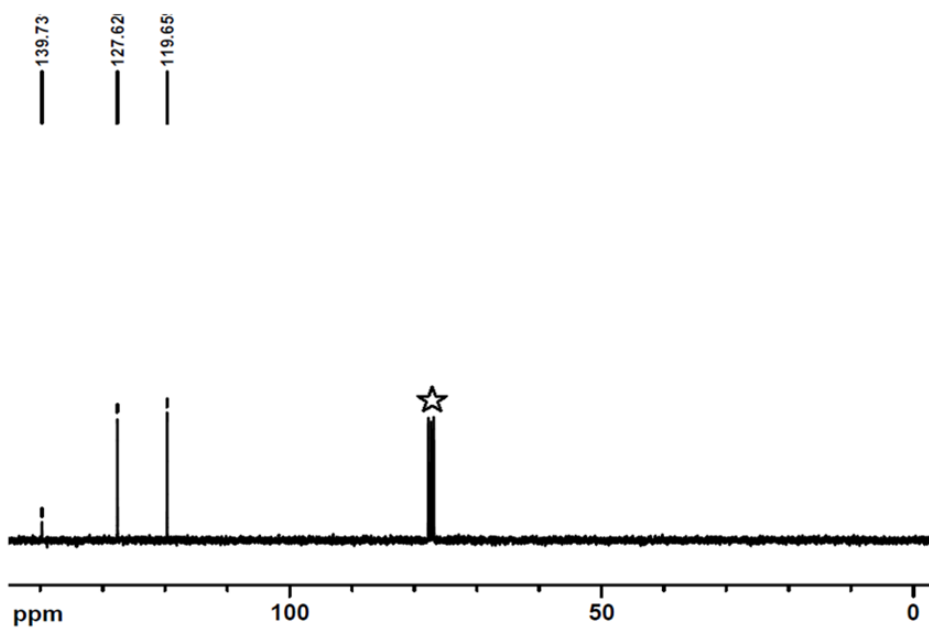

Figure S9.  $^{13}\text{C}$  NMR Spectrum of 1

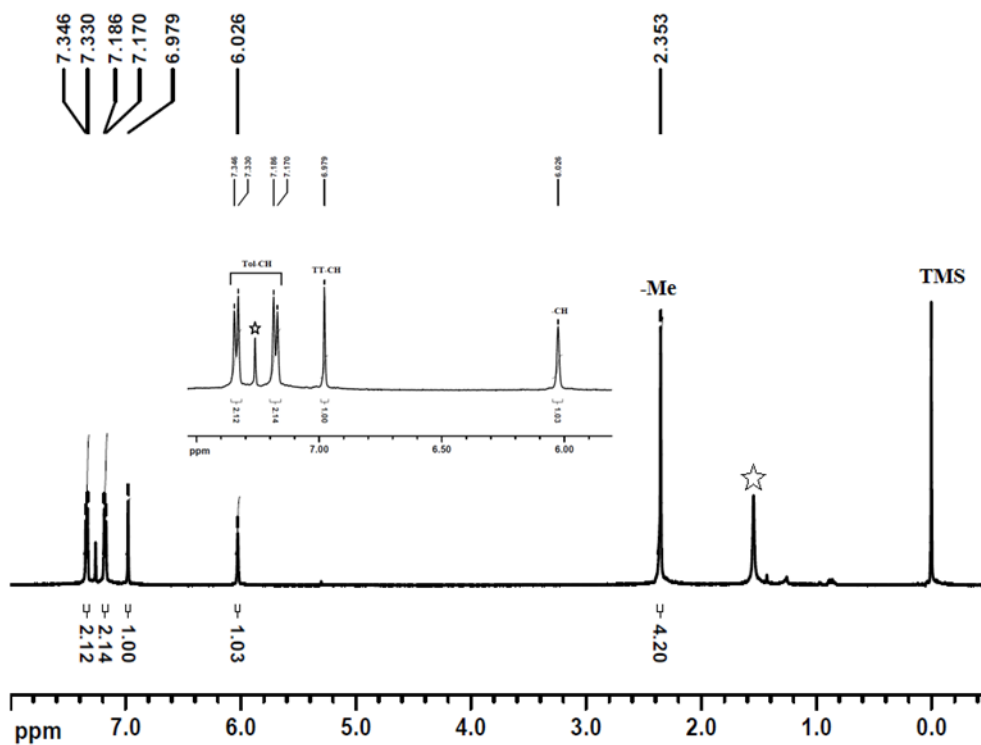

Figure S10.  $^1\text{H}$  NMR Spectrum of 2

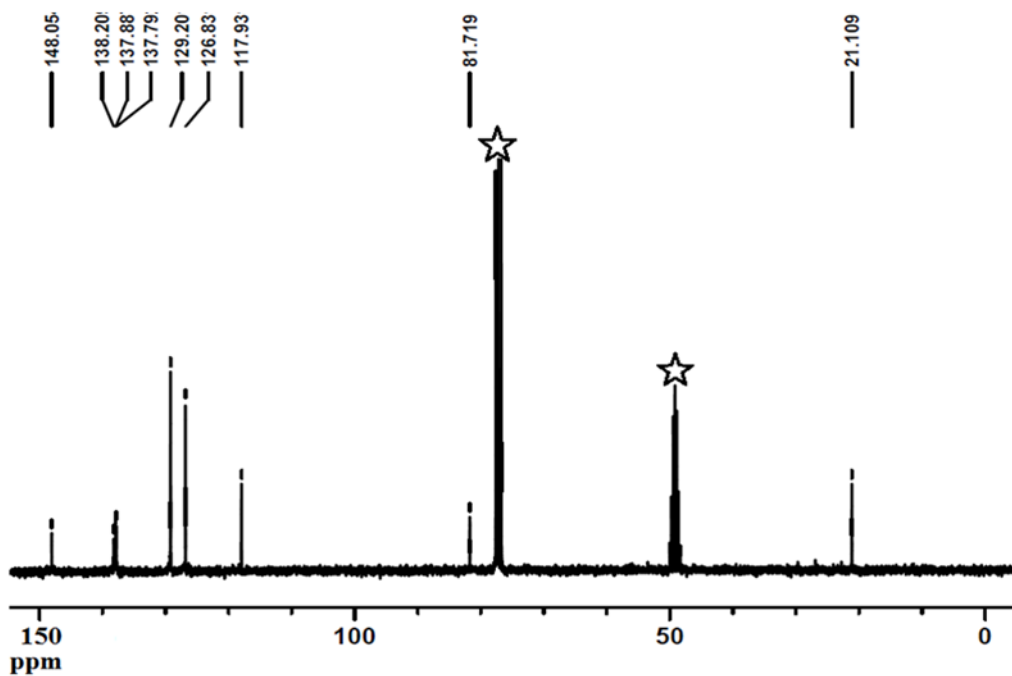

Figure S11.  $^{13}\text{C}$  NMR Spectrum of 2



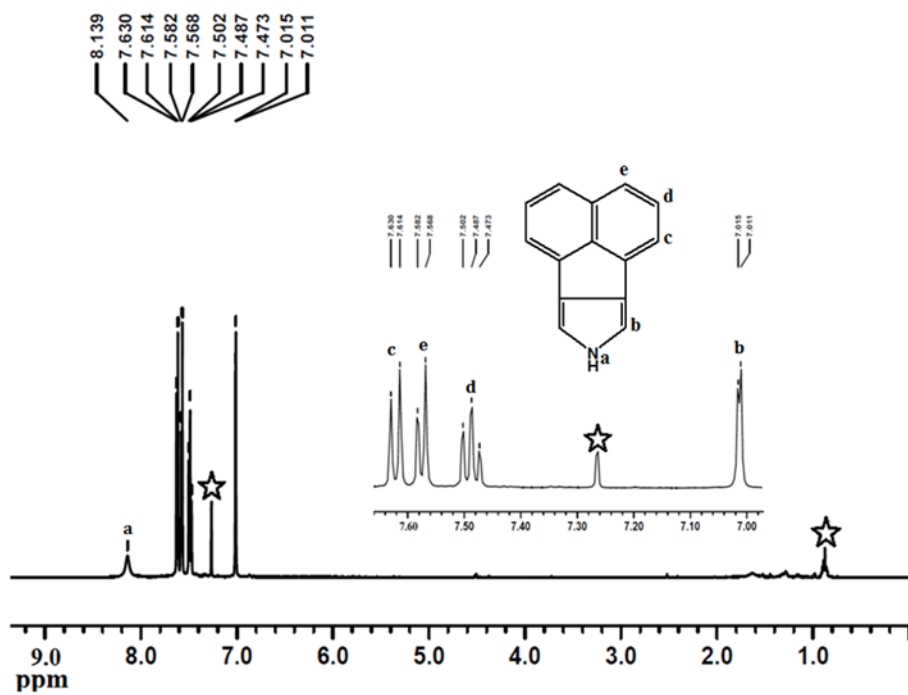

Figure S14. <sup>1</sup>H NMR Spectrum of 4

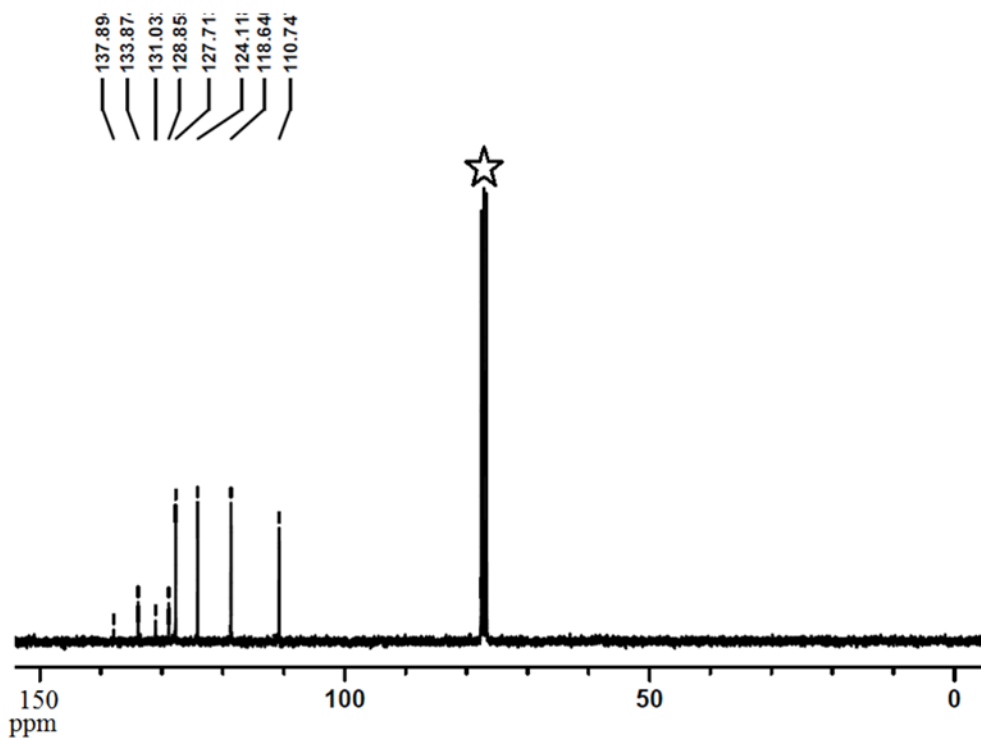

Figure S15. <sup>13</sup>C NMR Spectrum of 4

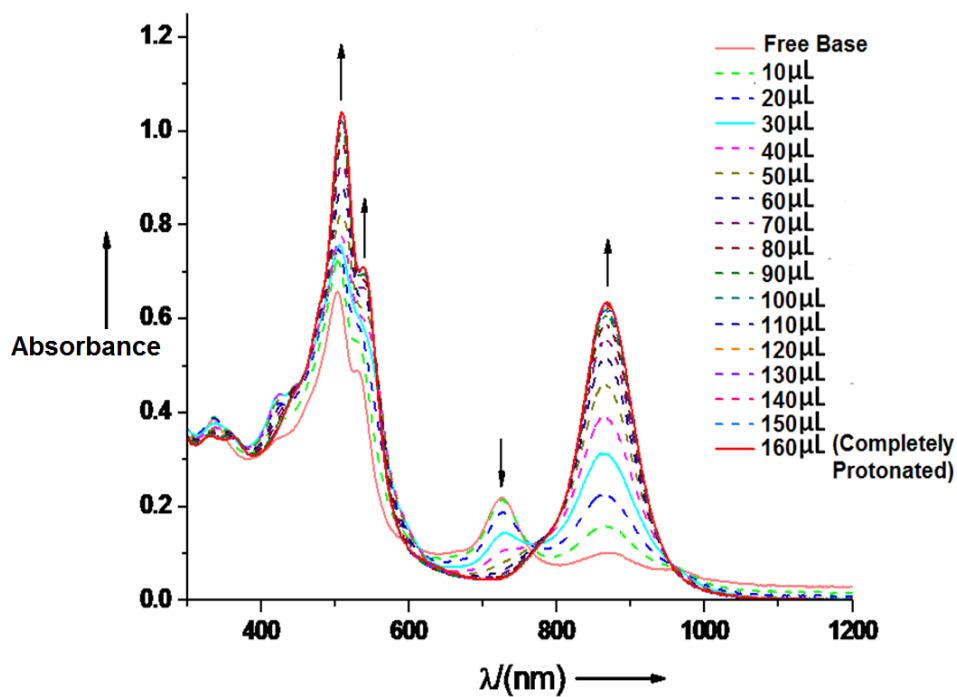

Figure S16. Acid titration UV-vis Spectra of 5 in  $\text{CH}_2\text{Cl}_2$

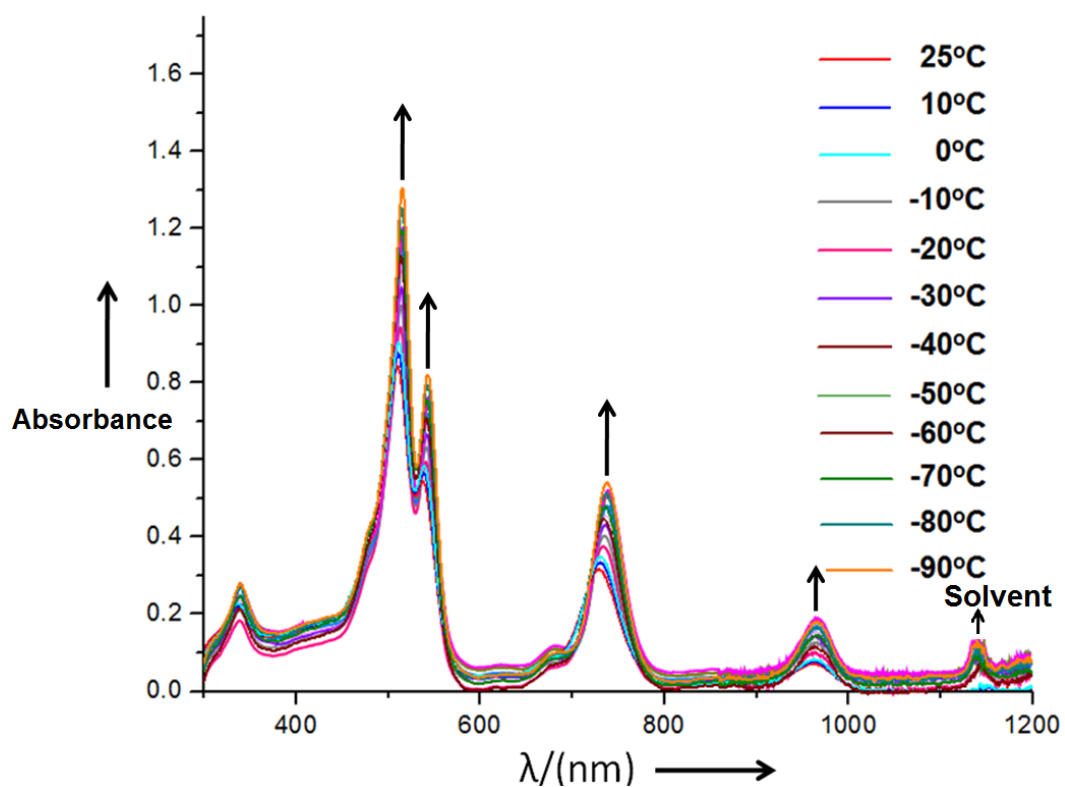

Figure S17. Low Temperature UV-vis Spectra of 5 in Dry Toluene

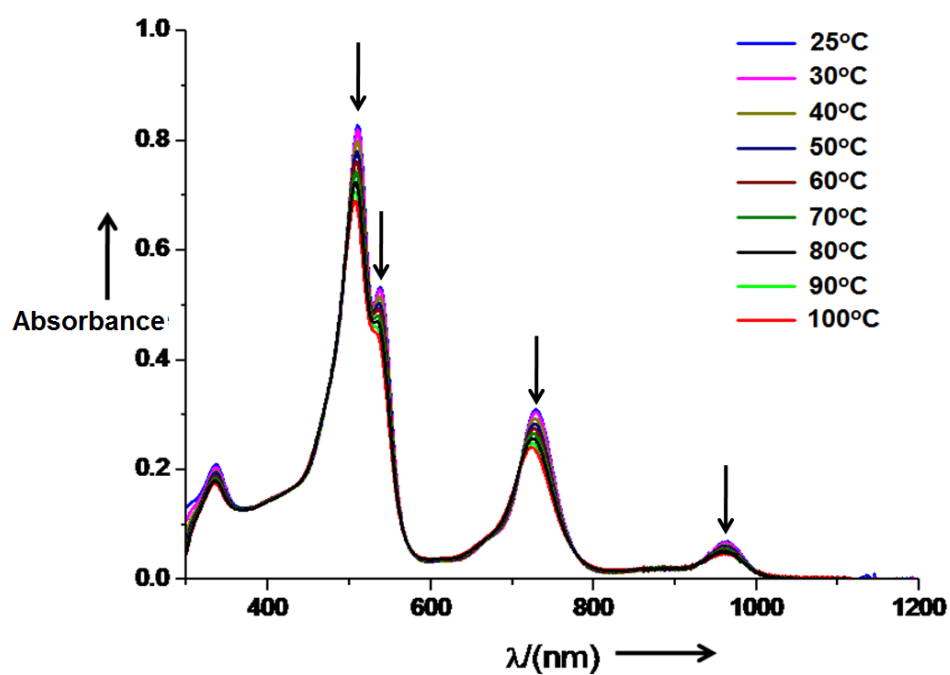

Figure S18. High Temperature UV-vis Spectra of 5 in Dry Toluene

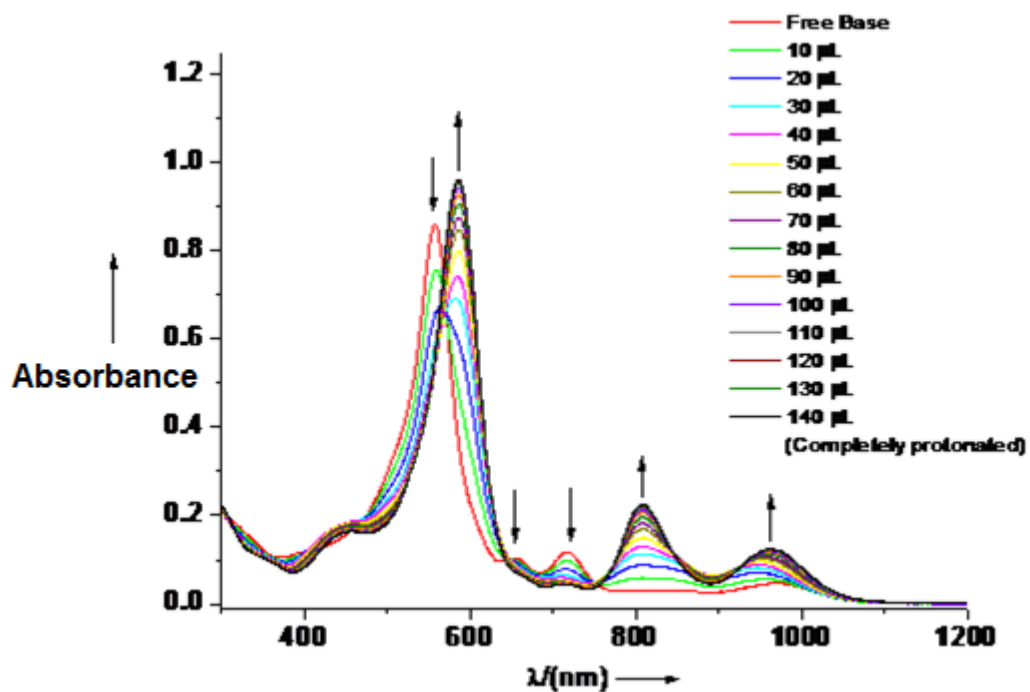

Figure S19. Acid titration UV-vis Spectra of 6 in  $\text{CH}_2\text{Cl}_2$

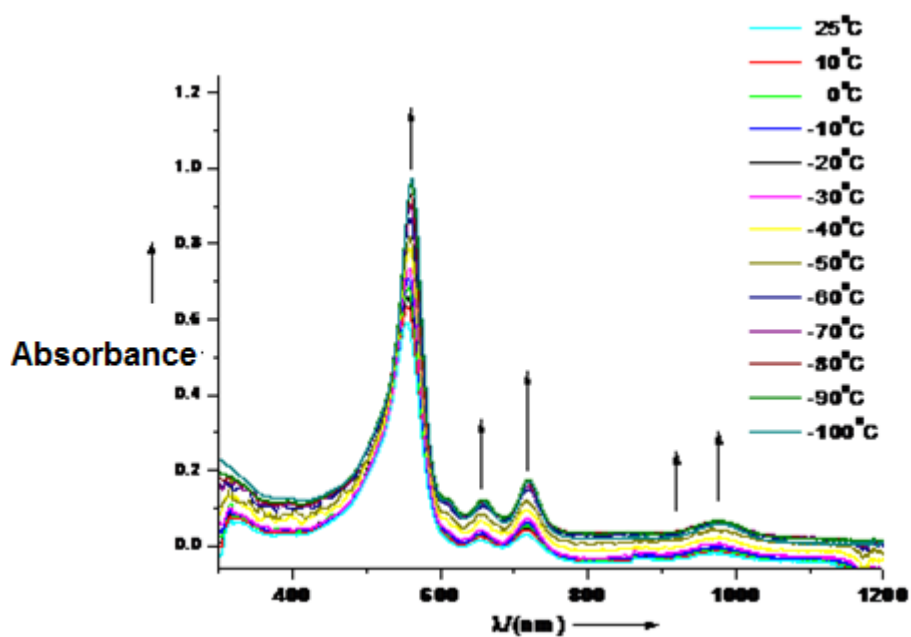

Figure S20. Low Temperature UV-vis Spectra of 6 in Dry THF

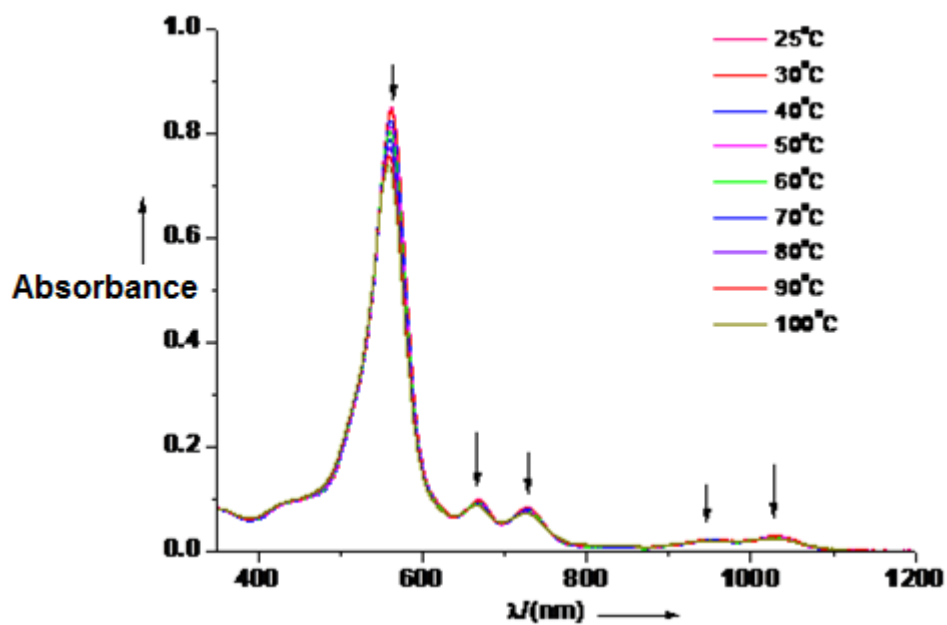

Figure S21. High Temperature UV-vis Spectra of 6 in Dry Toluene

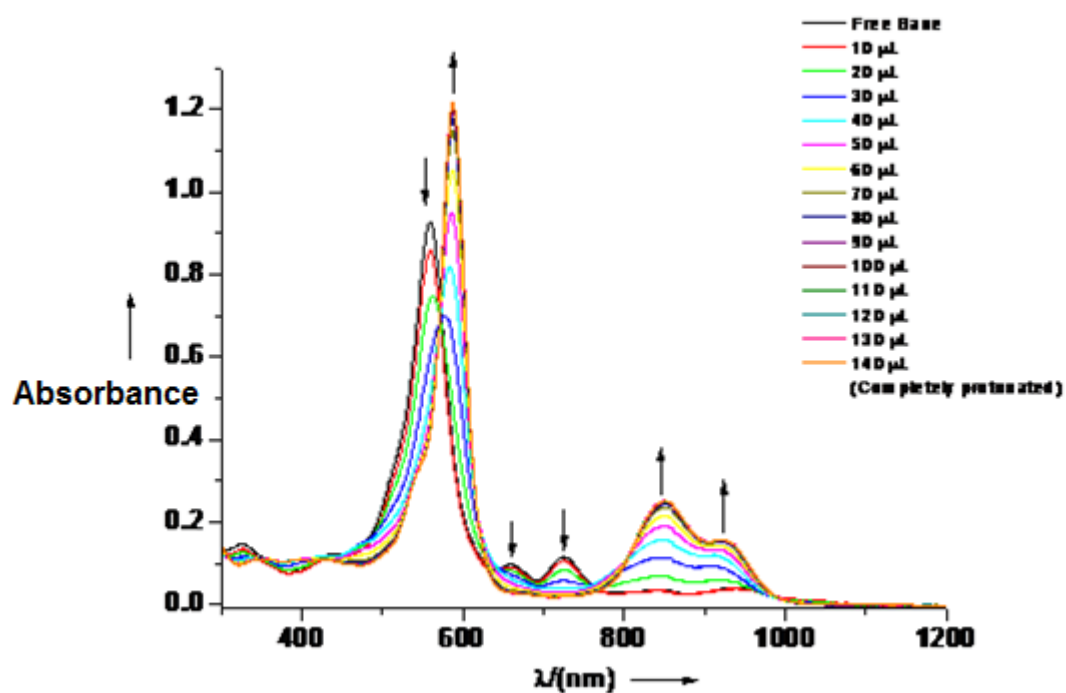

Figure S22. Acid titration UV-vis Spectra of 7 in  $\text{CH}_2\text{Cl}_2$

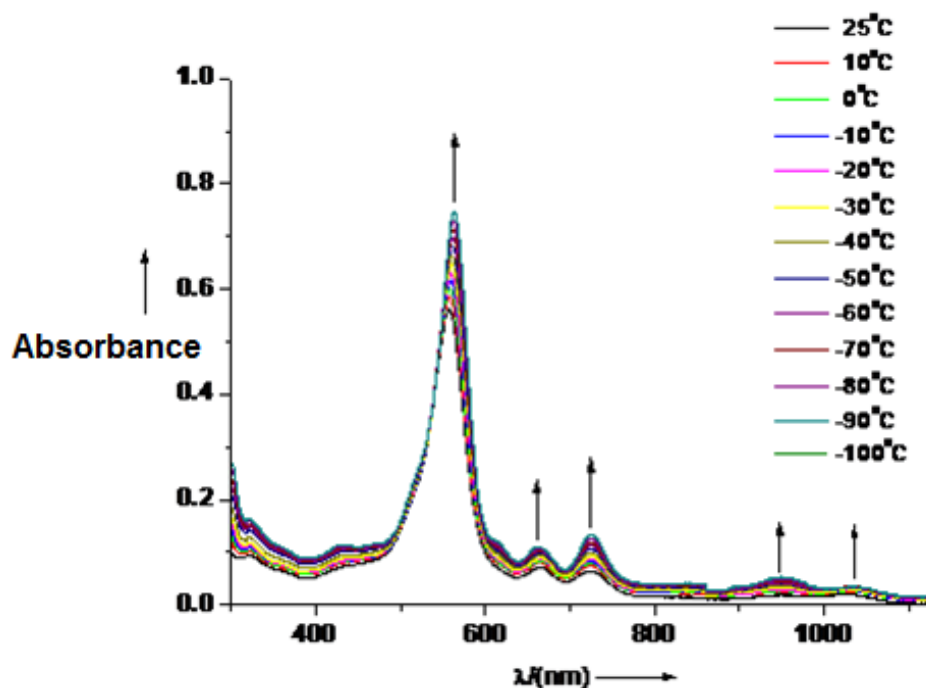

Figure S23. Low Temperature UV-vis Spectra of 7 in Dry THF



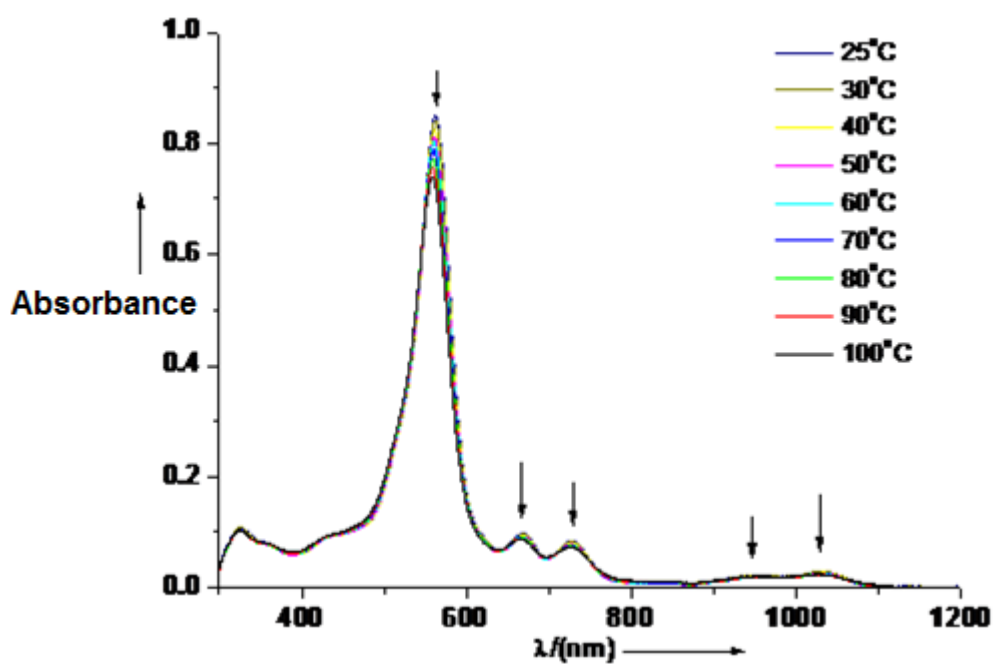

Figure S24. High Temperature UV-vis Spectra of 7 in Dry Toluene

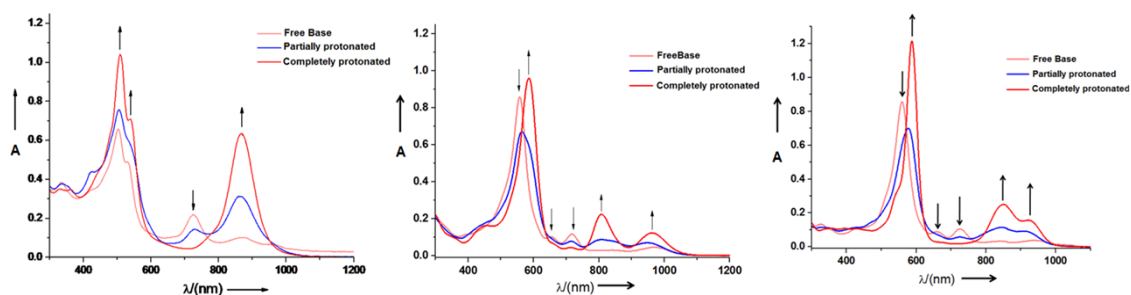

Figure S25. Comparative UV-vis Spectra of free base and protonated forms of 5, 6 and 7 in  $\text{CH}_2\text{Cl}_2$

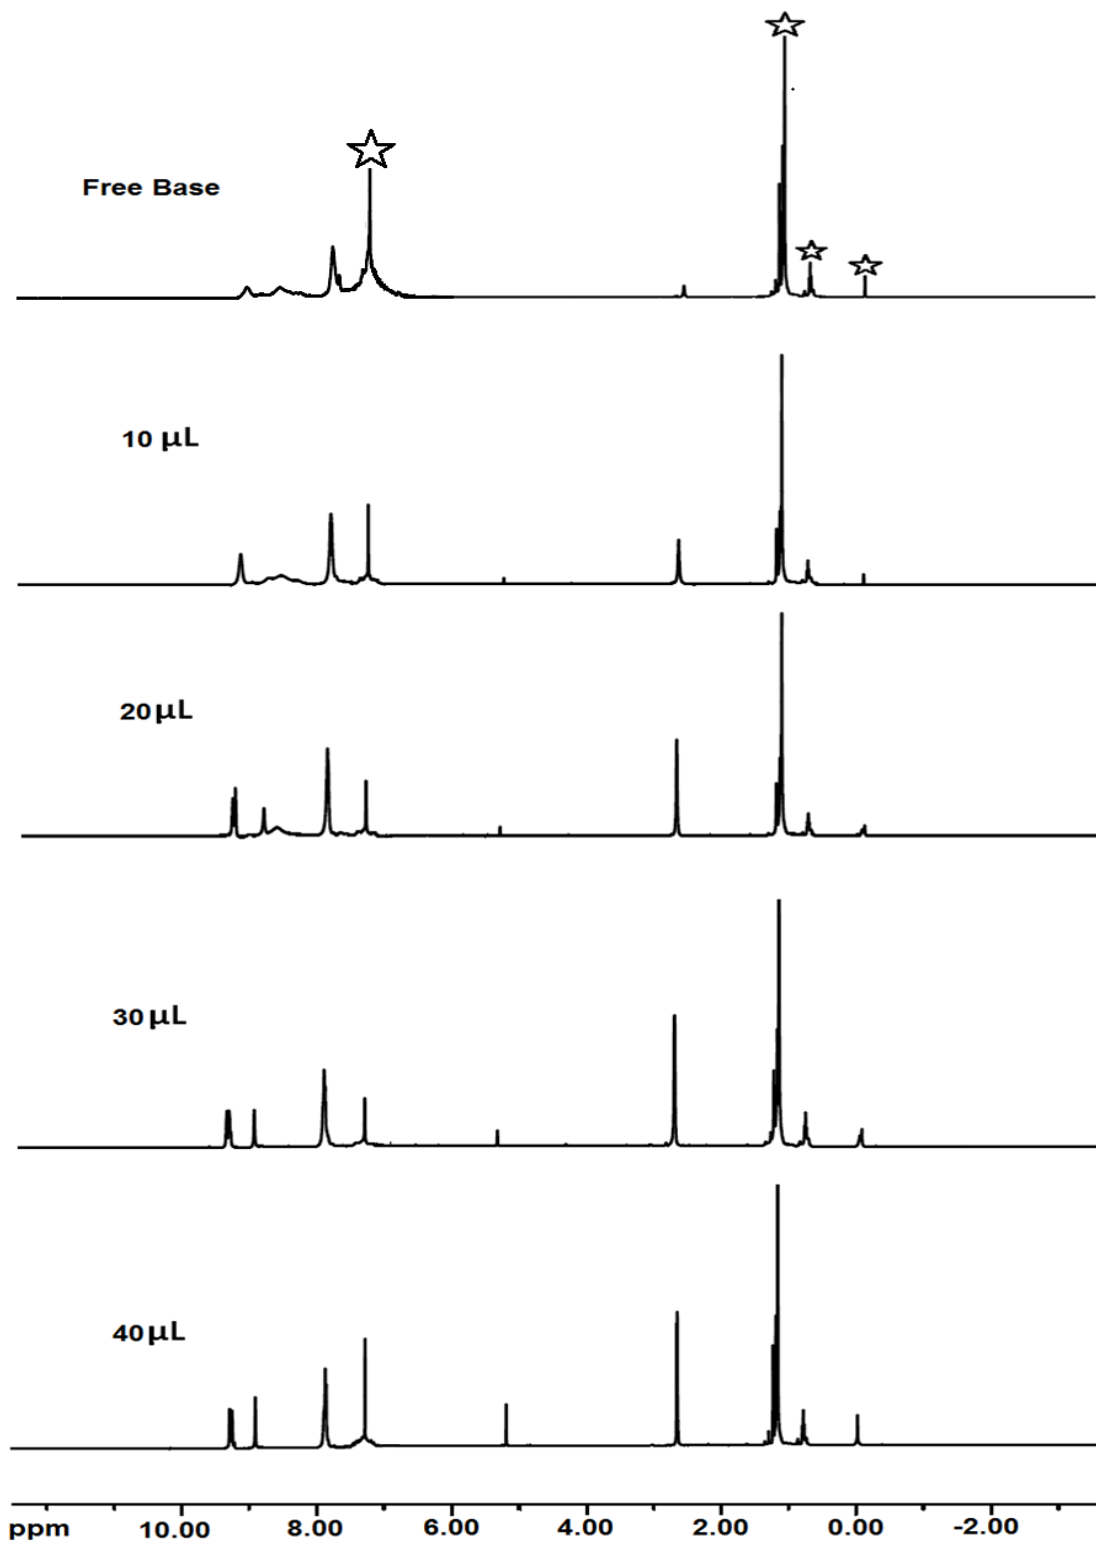

**Figure S26. Acid titration <sup>1</sup>H NMR Spectra of compound 5 at room temperature (10% TFA-d / CDCl<sub>3</sub> mixture)**

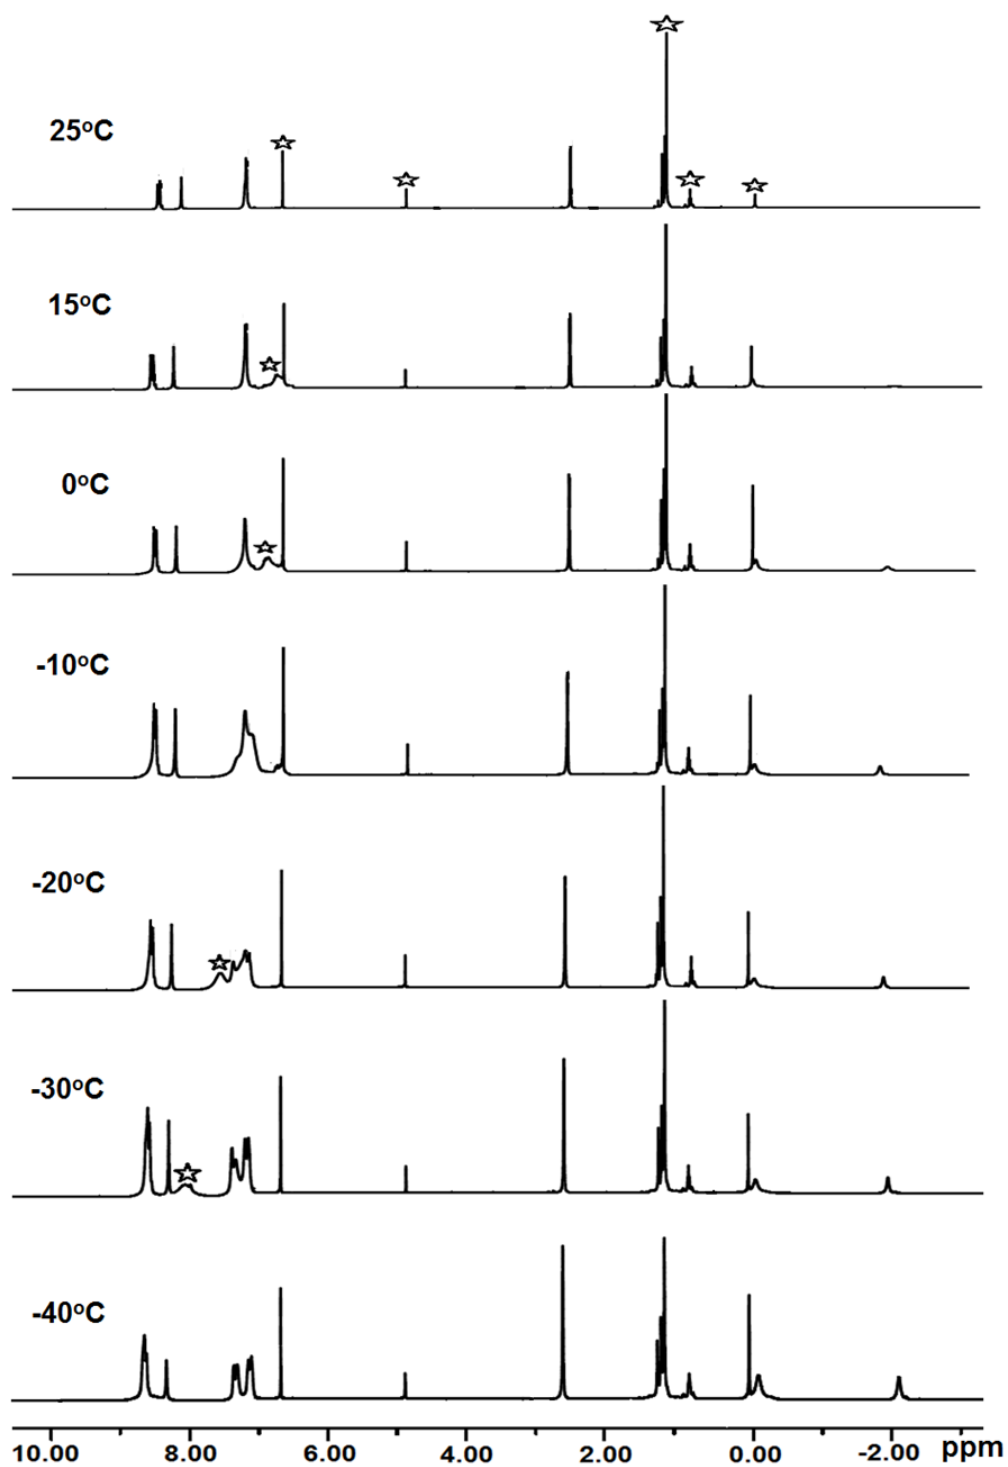

**Figure S27. Variable temperature <sup>1</sup>H NMR Spectra of protonated 5  
(10% TFA-d / CDCl<sub>3</sub> mixture)**

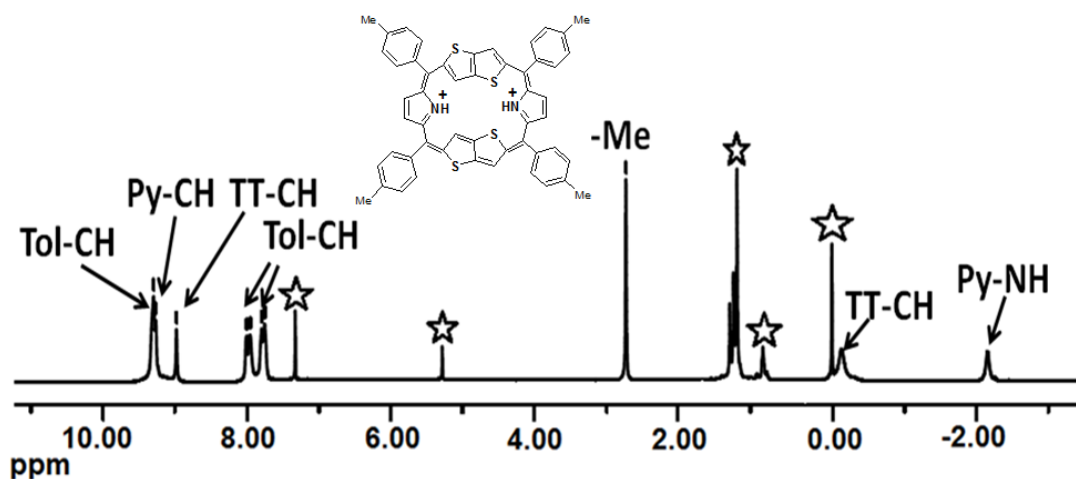

Figure S28. Complete assignment of  $^1\text{H}$  NMR Spectra of completely protonated 5 at  $-40^\circ\text{C}$

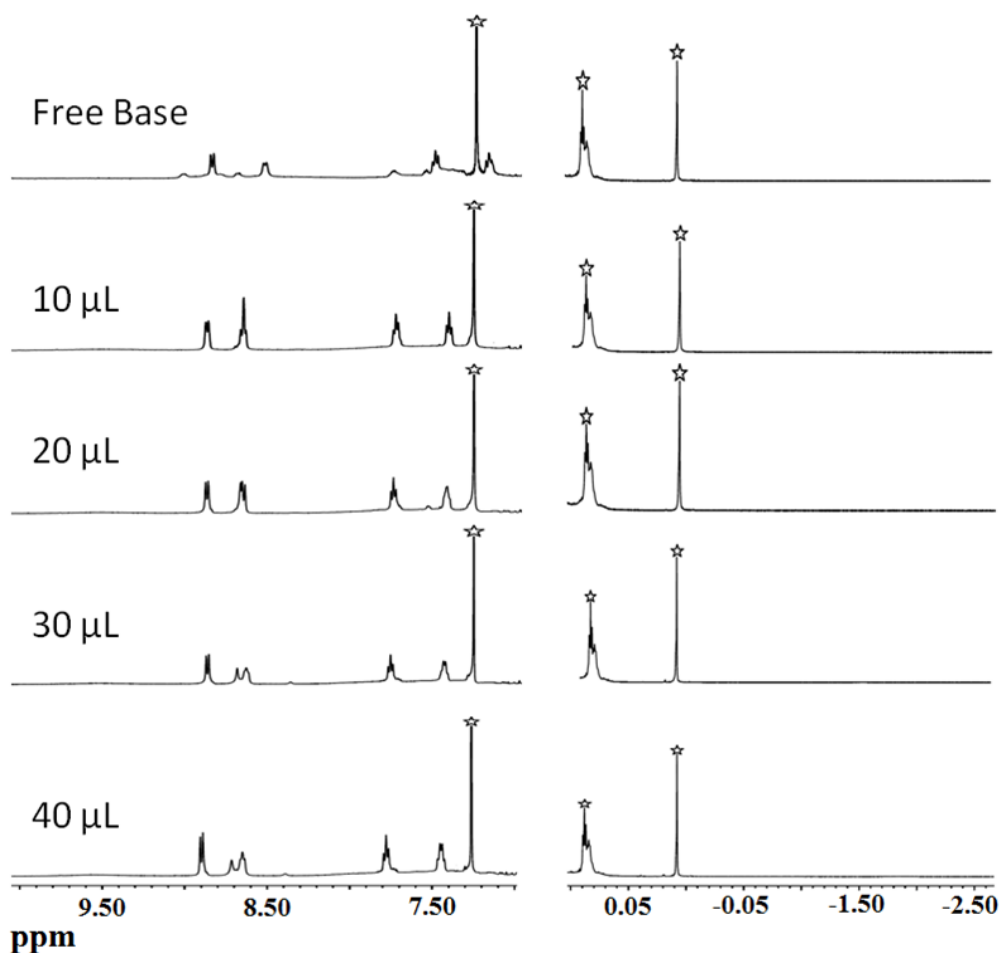

Figure S29. Acid titration  $^1\text{H}$  NMR Spectra of compound 6 at room temperature (10% TFA- $d$  /  $\text{CDCl}_3$  mixture)

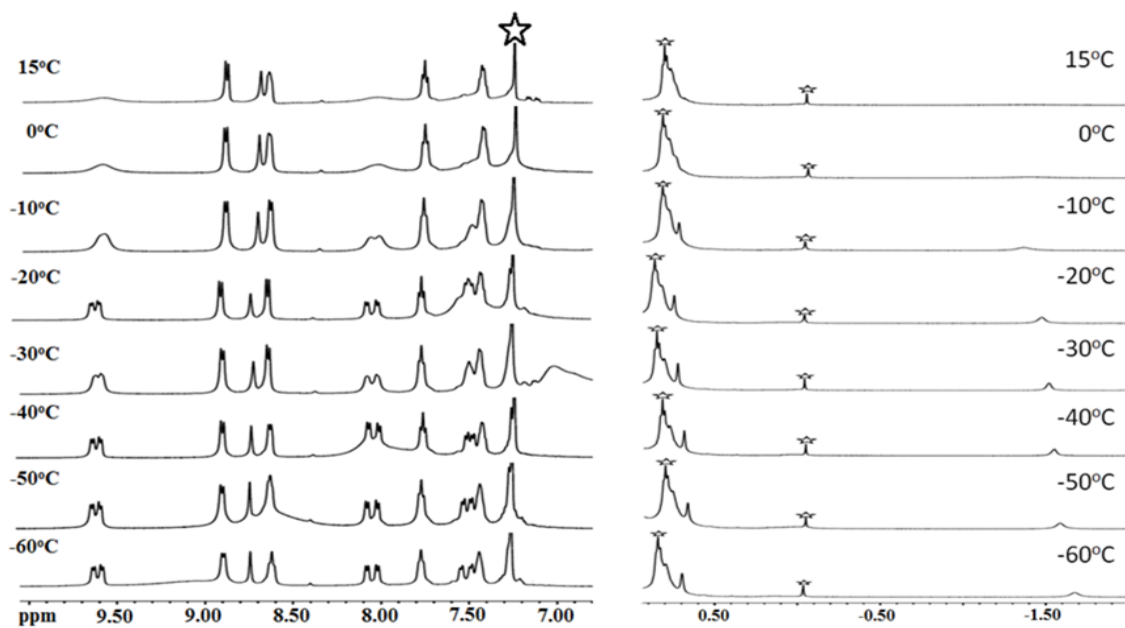

Figure S30. Variable temperature  $^1\text{H}$  NMR Spectra of protonated **6**  
(10% TFA-d /  $\text{CDCl}_3$  mixture)

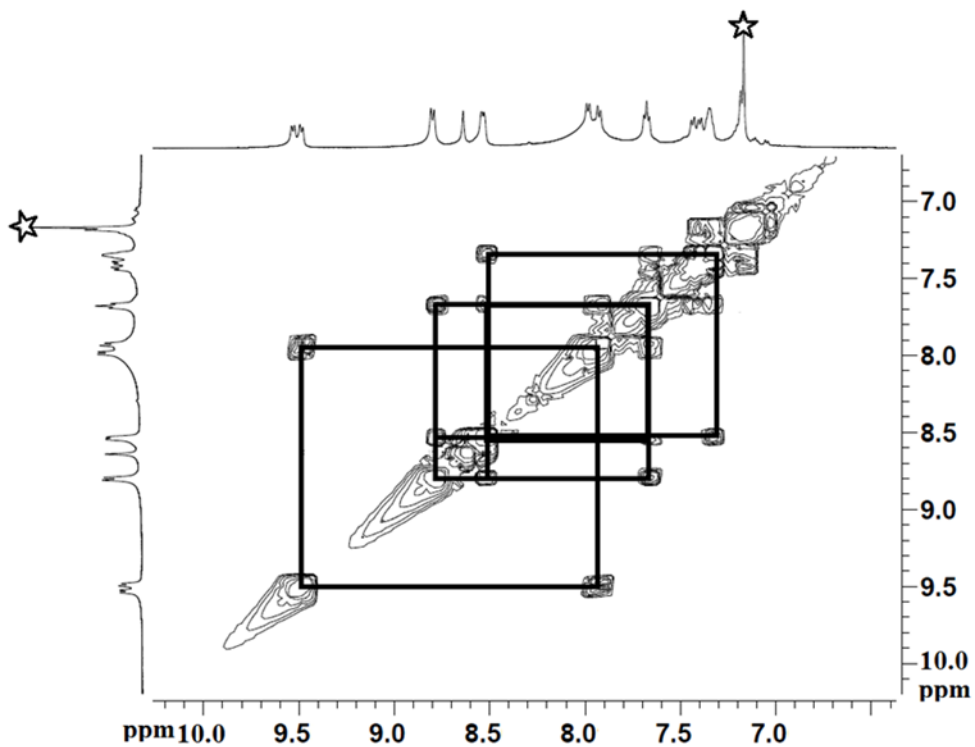

Figure S31.  $^1\text{H}$  - $^1\text{H}$  COSY Spectra of completely protonated **6** at  $-40^\circ\text{C}$

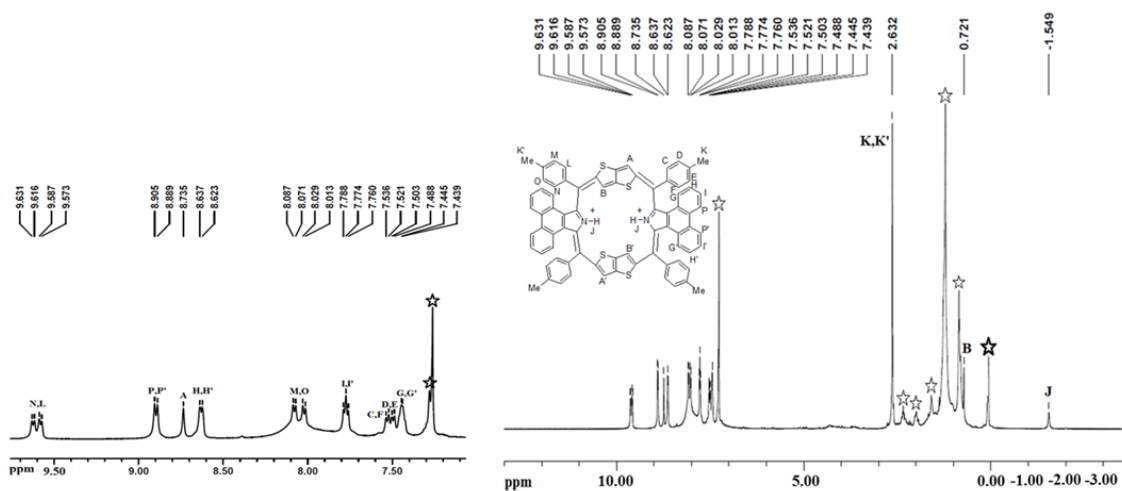

Figure S32. Complete assignment of  $^1\text{H}$  NMR Spectra of completely protonated **6** at  $-40^\circ\text{C}$

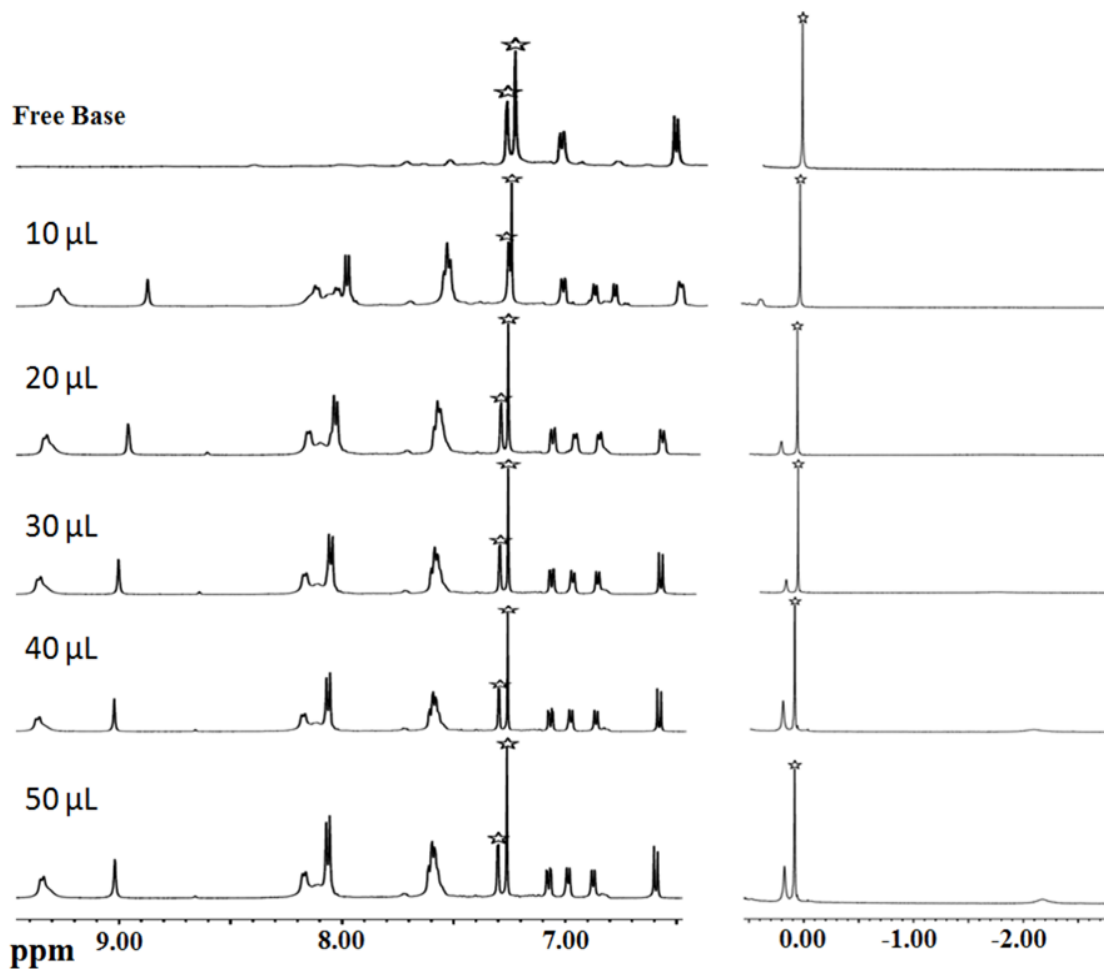

Figure S33. Acid titration  $^1\text{H}$  NMR Spectra of compound **7** at room temperature (10% TFA-d /  $\text{CDCl}_3$  mixture)

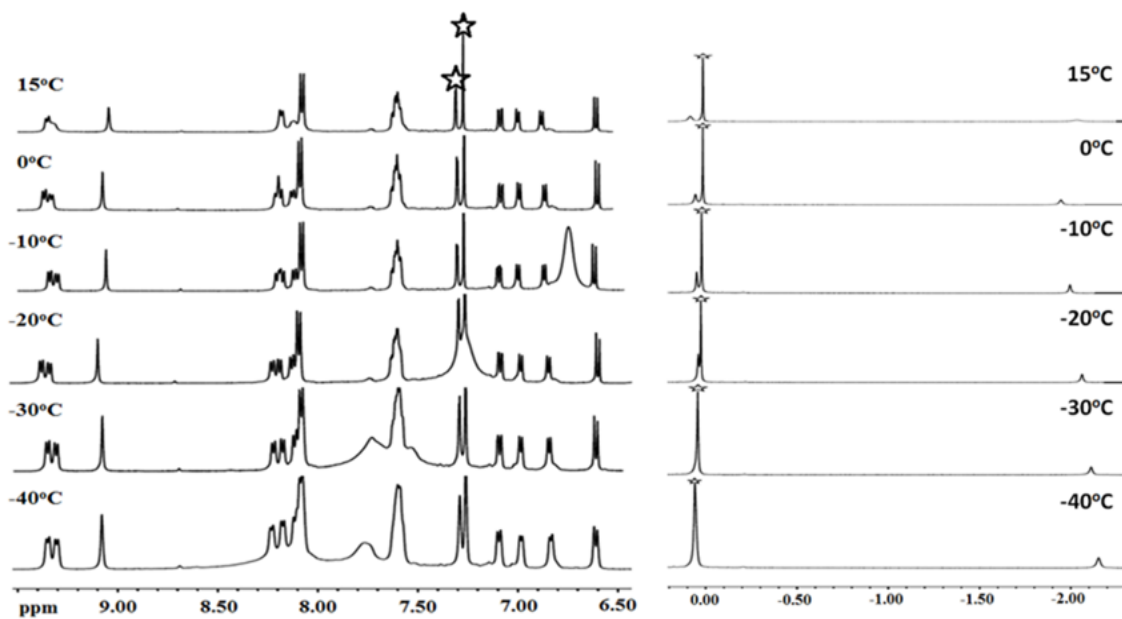

Figure S34. Low VT  $^1\text{H}$  NMR Spectra of Protonated 7 (10% TFA-d /  $\text{CDCl}_3$  mixture)

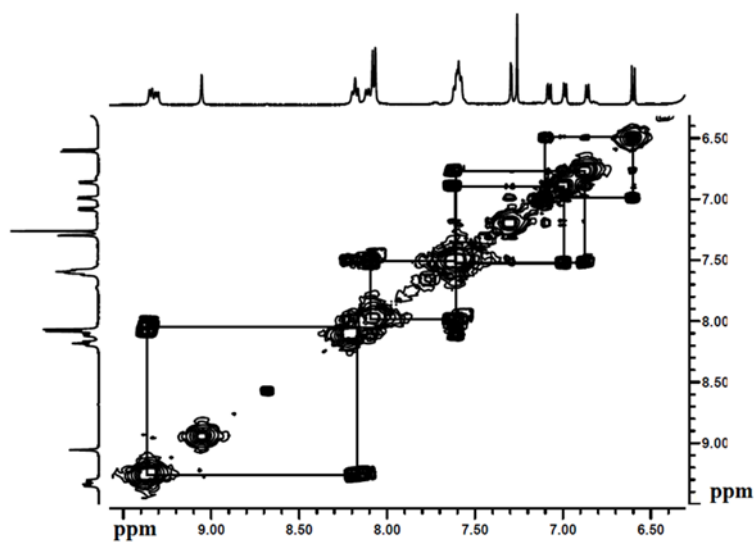

Figure S35.  $^1\text{H}$ - $^1\text{H}$  COSY spectra of protonated 7 at  $0^\circ\text{C}$

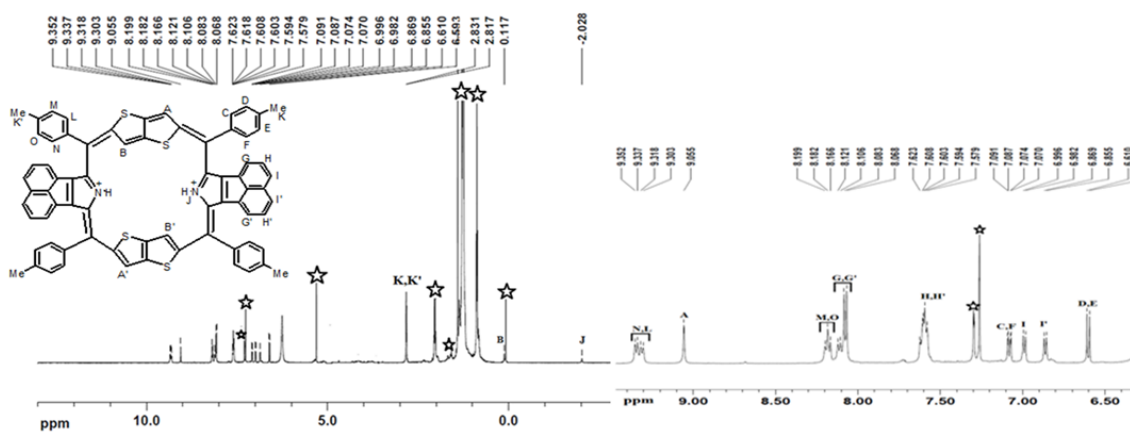

Figure S36. Complete  $^1\text{H}$  NMR assignment of protonated **7** at  $0^\circ\text{C}$

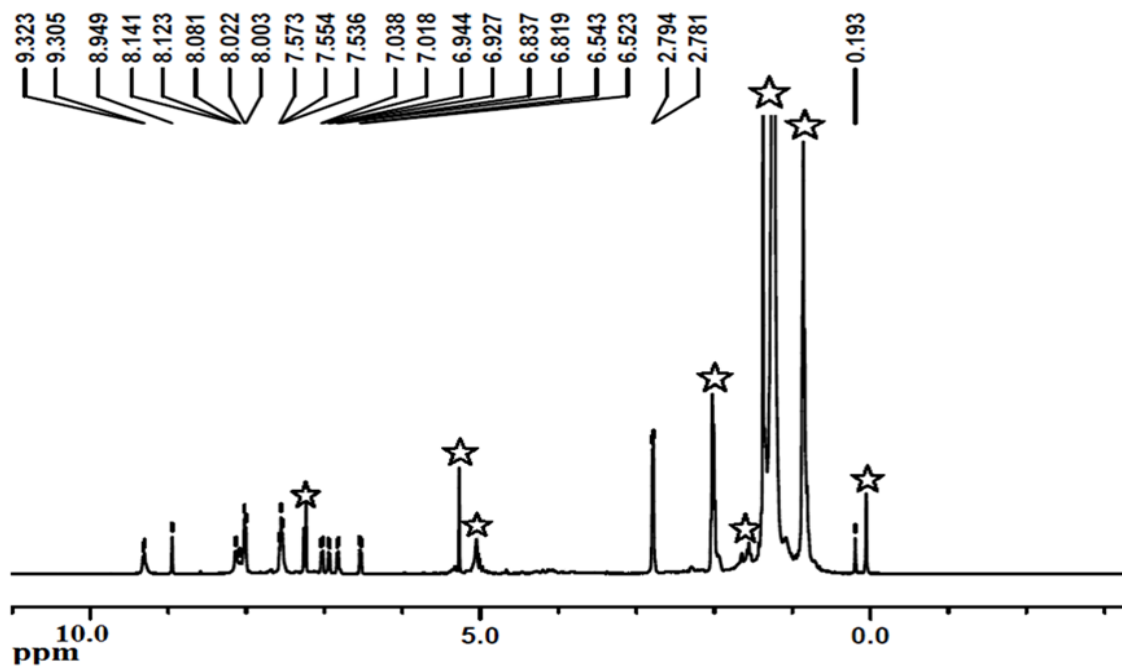

Figure S37.  $\text{D}_2\text{O}$  Exchange spectrum of protonated **7** at RT

☆: Residual solvent peak or solvent impurity



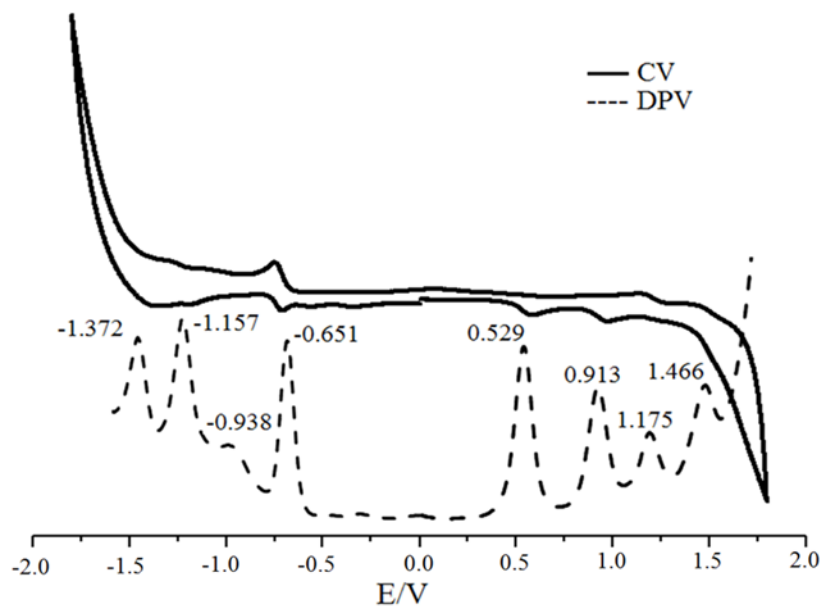

Figure S38. Cyclic Voltammogram of 6 in  $\text{CH}_2\text{Cl}_2$

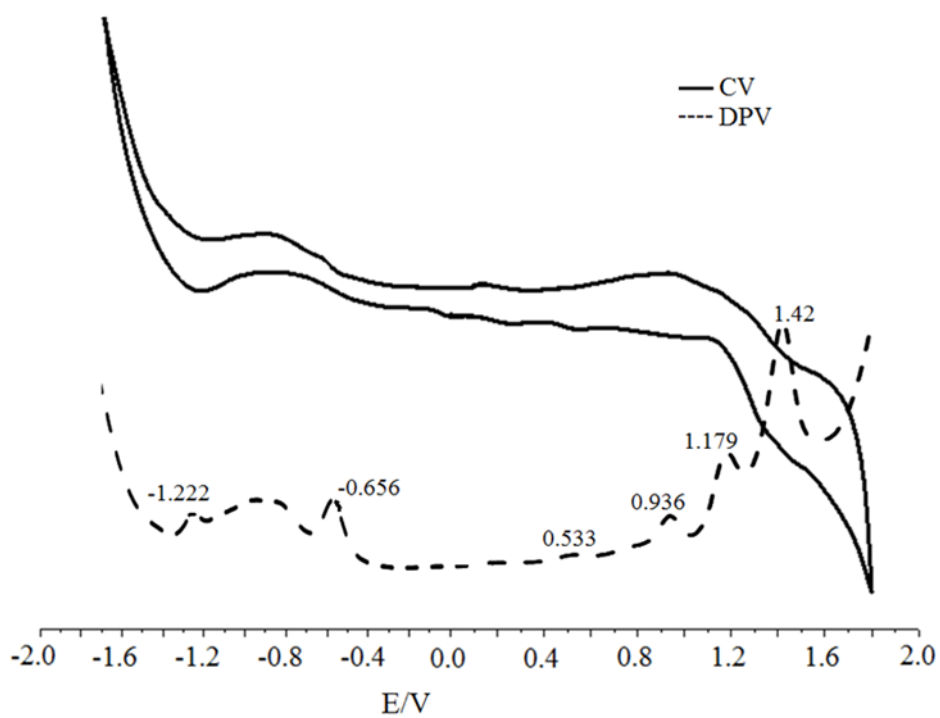

Figure S39. Cyclic Voltammogram of 7 in  $\text{CH}_2\text{Cl}_2$

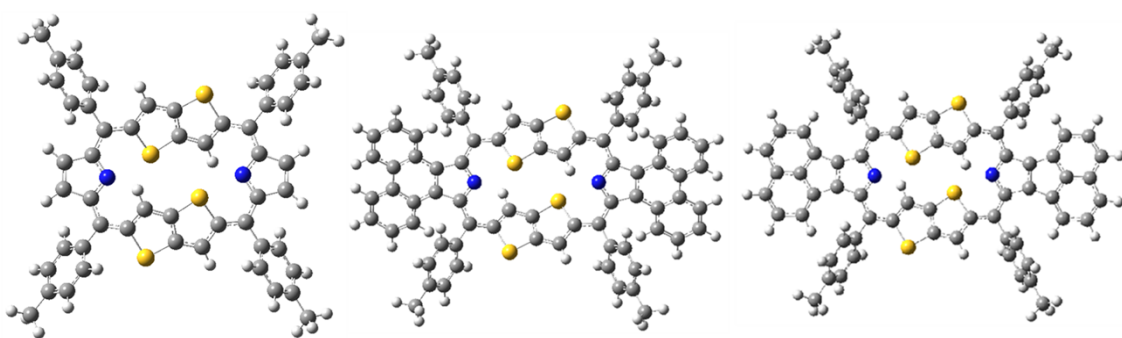

Figure S40. Energy minimized structure of 5, 6 and 7 by DFT method at B3LYP/6-31G\* level using Gaussian 09 program (top view)

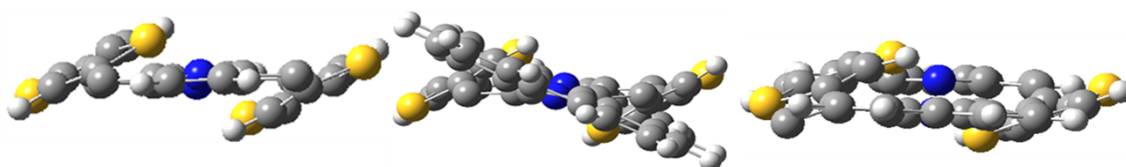

Figure S41. Energy minimized structure of 5, 6 and 7 by DFT method (side view)

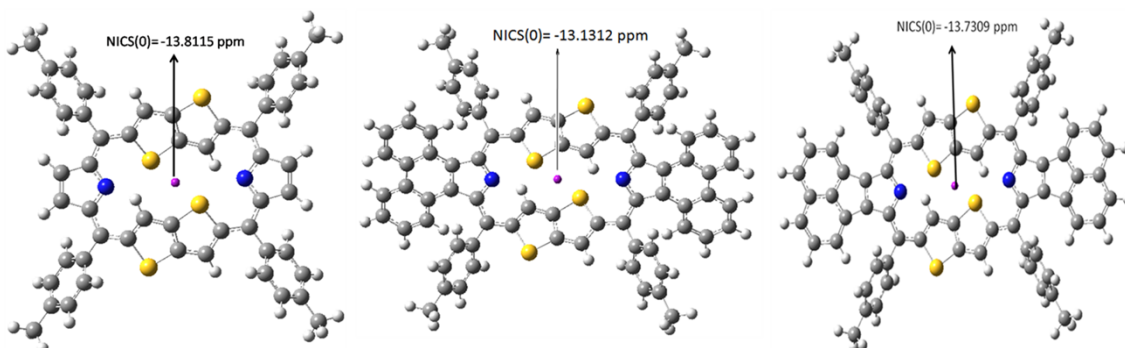

Figure S42. Calculated NICS (0) value for 5, 6 and 7

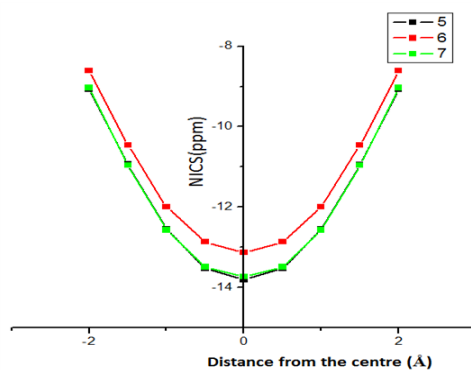

Figure S43. Plot of Chemical shift vs distance of NICS probe for 5, 6 and 7

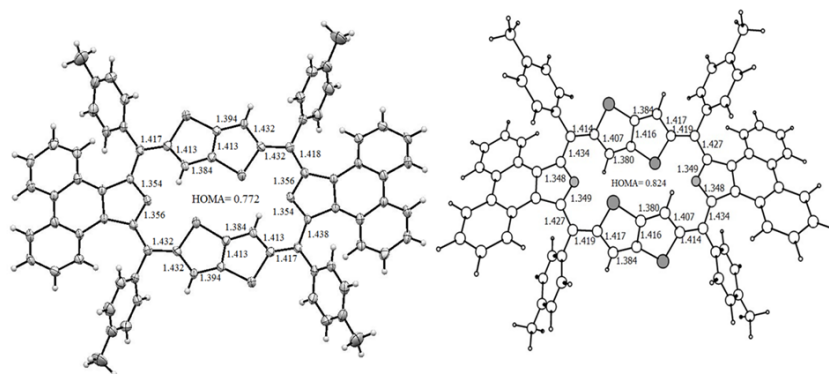

Figure S44. HOMA values from X-ray crystal structure (left) and energy minimized structure (right) of 6

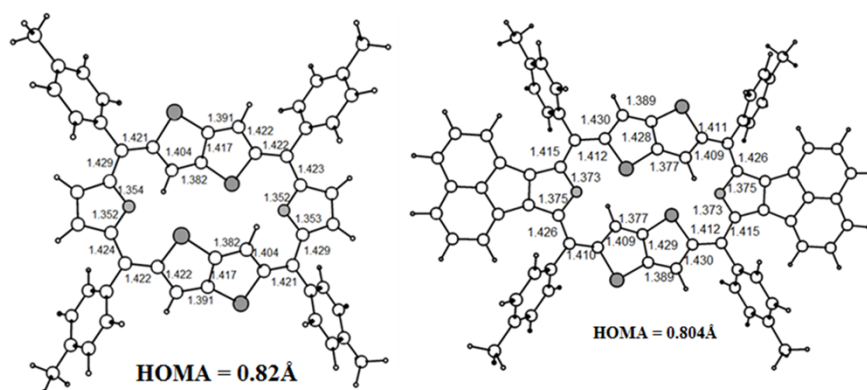

Figure S45. HOMA value from DFT-optimized structure of 5 and 7

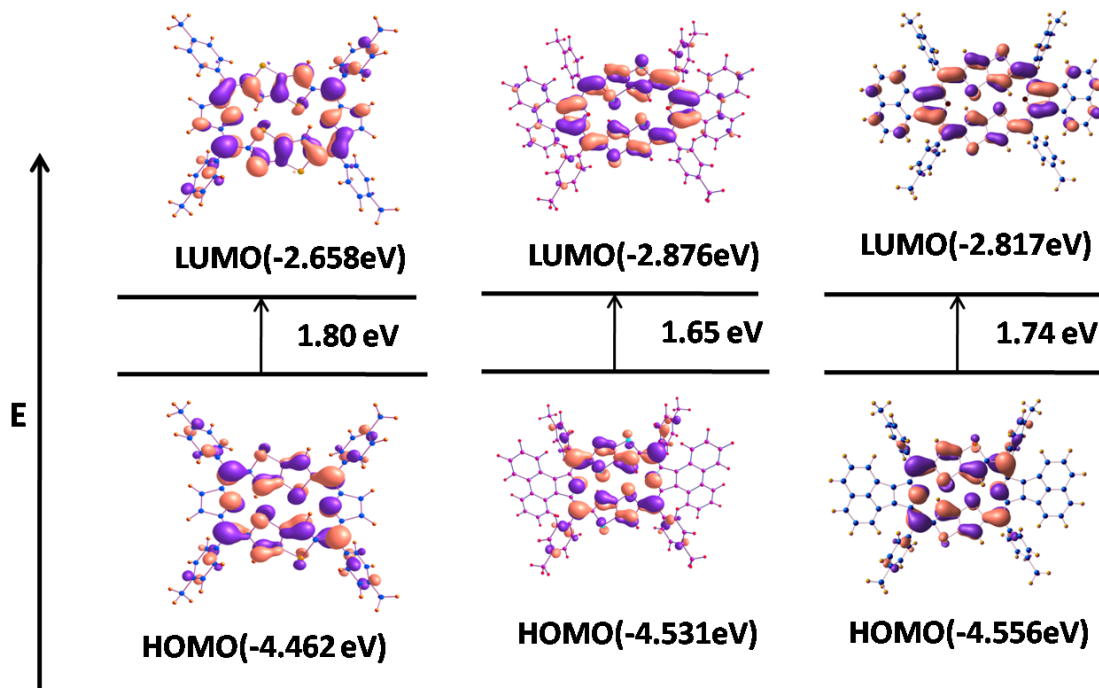

Figure S46. FMO energy diagram from DFT-optimized structure of 5, 6 and 7

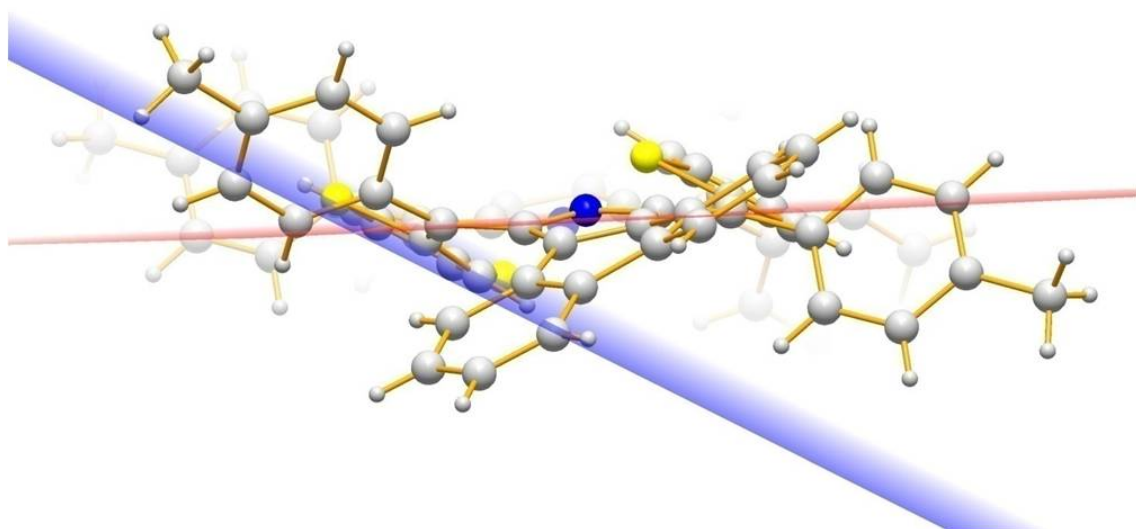

**Figure S47. Dihedral Angle between fused thiophene ring plane and Macrocyclic plane (defined through *meso* carbons) for 6**

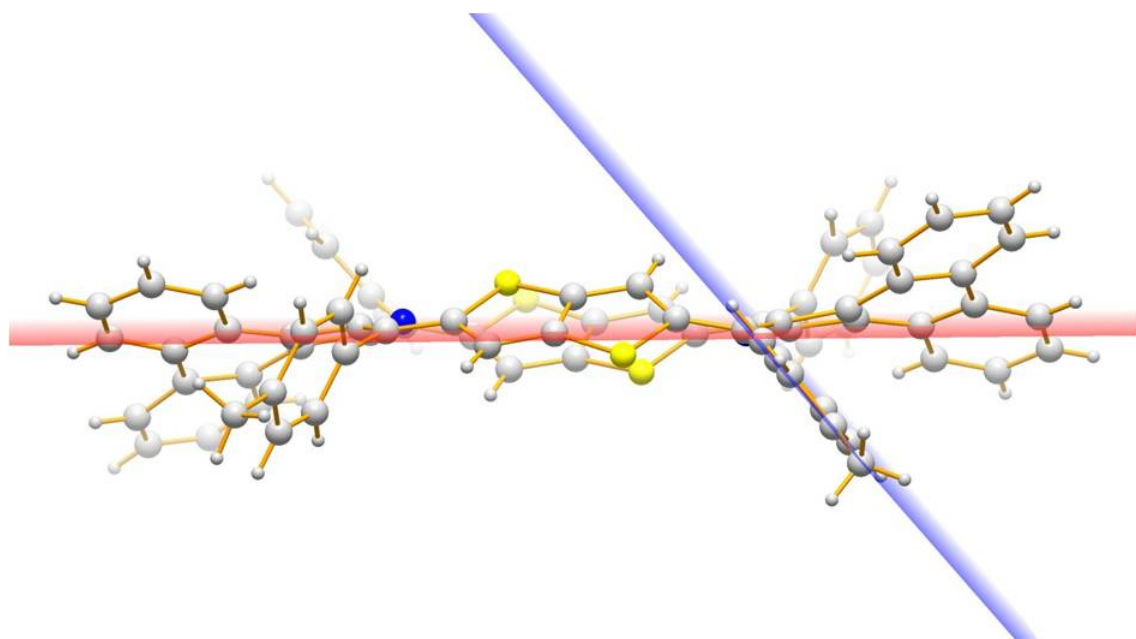

**Figure S48. Dihedral Angle between tolyl ring plane (C32, C33, C34, C35, C36, C37) and Macrocyclic plane (defined through *meso* carbons) for 6**

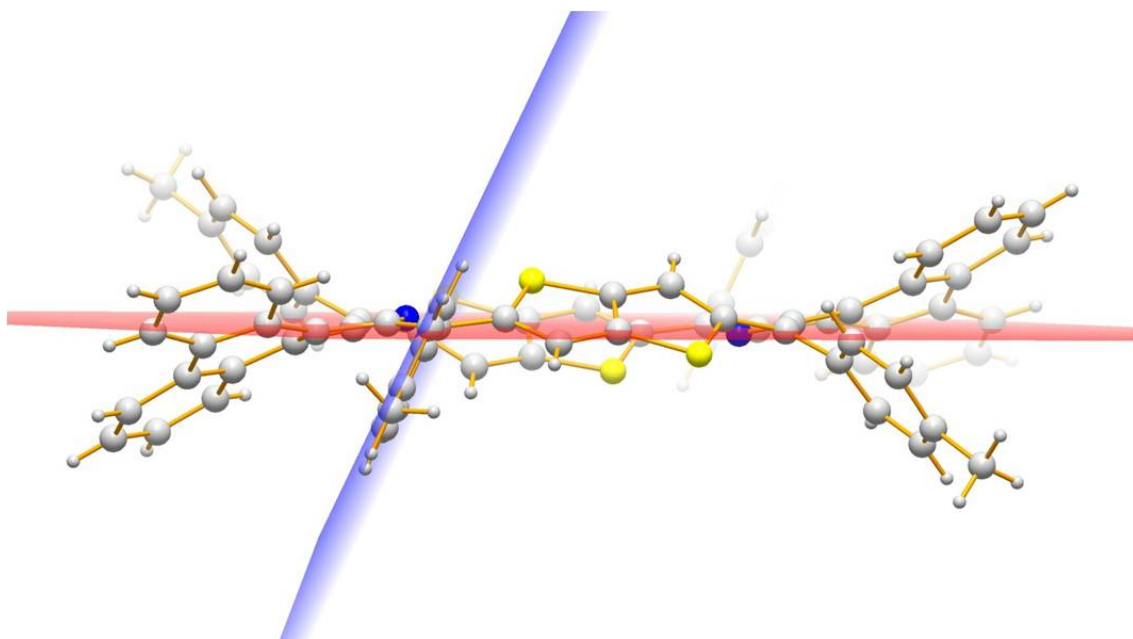

**Figure S49. Dihedral Angle between tolyl ring plane (C24, C25, C26, C27, C28, C29) and Macrocycle plane (defined through *meso* carbons) for 6**

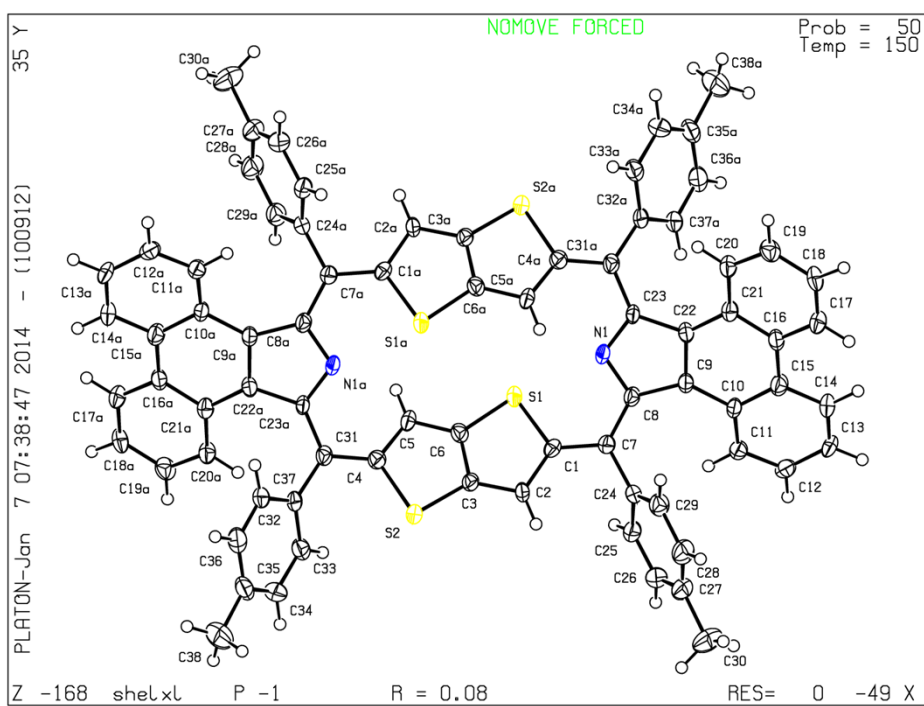

**Figure S50. Molecular Structure of 6 with atom labelling**

### Crystal data and structure refinement for 6

|                                   |                                                                                                                                         |
|-----------------------------------|-----------------------------------------------------------------------------------------------------------------------------------------|
| Empirical formula                 | C76 H48 N2 S4                                                                                                                           |
| Formula weight                    | 1117.40                                                                                                                                 |
| Temperature                       | 150(2) K                                                                                                                                |
| Wavelength                        | 0.71075 Å                                                                                                                               |
| Crystal system                    | Triclinic                                                                                                                               |
| Space group                       | P -1                                                                                                                                    |
| Unit cell dimensions              | a = 8.230(5) Å $\alpha = 78.34(2)^\circ$ .<br>B = 14.220(9) Å $\beta = 76.48(2)^\circ$ .<br>C = 14.339(9) Å $\gamma = 83.47(3)^\circ$ . |
| Volume                            | 1594.0(17) Å <sup>3</sup>                                                                                                               |
| Z                                 | 1                                                                                                                                       |
| Density (calculated)              | 1.164 Mg/m <sup>3</sup>                                                                                                                 |
| Absorption coefficient            | 0.193 mm <sup>-1</sup>                                                                                                                  |
| F(000)                            | 582                                                                                                                                     |
| Crystal size                      | 0.15 x 0.07 x 0.01 mm <sup>3</sup>                                                                                                      |
| Theta range for data collection   | 2.66 to 25.00°.                                                                                                                         |
| Index ranges                      | -9<=h<=6, -16<=k<=16, -17<=l<=15                                                                                                        |
| Reflections collected             | 11841                                                                                                                                   |
| Independent reflections           | 5558 [R (int) = 0.0527]                                                                                                                 |
| Completeness to theta = 25.00°    | 99.0 %                                                                                                                                  |
| Absorption correction             | Semi-empirical from equivalents                                                                                                         |
| Max. And min. Transmission        | 0.9981 and 0.9717                                                                                                                       |
| Refinement method                 | Full-matrix least-squares on F <sup>2</sup>                                                                                             |
| Data / restraints / parameters    | 5558 / 0 / 371                                                                                                                          |
| Goodness-of-fit on F <sup>2</sup> | 1.128                                                                                                                                   |
| Final R indices [I>2sigma (I)]    | R1 = 0.0843, wR2 = 0.1643                                                                                                               |
| R indices (all data)              | R1 = 0.1083, wR2 = 0.1759                                                                                                               |
| Largest diff. Peak and hole       | 0.346 and -0.305 e.Å <sup>-3</sup>                                                                                                      |
| CCDC number                       | 990113                                                                                                                                  |

### Computational Details: Cartesian Coordinates of DFT- optimized Structure of 5

| No. | Atom | X         | Y         | Z         |
|-----|------|-----------|-----------|-----------|
| 1   | C    | -0.703985 | 3.773054  | -0.257178 |
| 2   | C    | 0.575104  | 3.274639  | -0.482147 |
| 3   | C    | -1.722284 | 2.817245  | -0.524578 |
| 4   | C    | 0.580037  | 1.959655  | -1.009782 |
| 5   | C    | 2.859210  | 2.164979  | -0.587639 |
| 6   | C    | 1.824482  | 1.366289  | -1.101339 |
| 7   | C    | 4.172430  | 1.726543  | -0.269724 |
| 8   | C    | 5.265423  | 2.700240  | -0.067734 |
| 9   | C    | 4.413147  | 0.329652  | -0.086575 |
| 10  | C    | 5.692173  | -0.381594 | -0.113540 |
| 11  | C    | 3.944383  | -1.799442 | 0.119235  |
| 12  | C    | 5.398756  | -1.710255 | -0.003107 |
| 13  | C    | -3.112943 | 2.946706  | -0.258315 |
| 14  | C    | -3.944289 | 1.799467  | -0.119593 |
| 15  | C    | -4.413257 | -0.329614 | 0.086294  |
| 16  | C    | -5.398687 | 1.710383  | 0.002564  |
| 17  | C    | -5.692202 | 0.381754  | 0.113072  |
| 18  | C    | -1.824510 | -1.366227 | 1.101273  |
| 19  | C    | -0.579968 | -1.959573 | 1.009580  |
| 20  | C    | -2.859133 | -2.164786 | 0.587389  |
| 21  | C    | -0.575061 | -3.274351 | 0.481564  |
| 22  | C    | 1.722316  | -2.817097 | 0.524234  |
| 23  | C    | 0.704091  | -3.772746 | 0.256466  |
| 24  | C    | 3.113115  | -2.946568 | 0.257982  |
| 25  | C    | -4.172526 | -1.726369 | 0.269592  |
| 26  | C    | -3.678287 | 4.301758  | -0.049389 |
| 27  | C    | -4.775356 | 6.898984  | 0.335221  |
| 28  | C    | -5.333439 | 8.284705  | 0.556718  |
| 29  | C    | -5.043030 | 5.858578  | 1.235308  |
| 30  | C    | -4.506939 | 4.586729  | 1.051543  |

|    |   |           |           |           |
|----|---|-----------|-----------|-----------|
| 31 | C | -3.951442 | 6.616107  | -0.762436 |
| 32 | C | -3.409922 | 5.347280  | -0.951775 |
| 33 | C | -5.265428 | -2.700286 | 0.068056  |
| 34 | C | -7.366142 | -4.580337 | -0.315035 |
| 35 | C | -7.201921 | -3.490713 | -1.182026 |
| 36 | C | -6.176256 | -2.568550 | -0.998119 |
| 37 | C | -6.457328 | -4.716465 | 0.742666  |
| 38 | C | -5.428310 | -3.798529 | 0.933571  |
| 39 | C | -8.498775 | -5.561026 | -0.503303 |
| 40 | C | 3.678313  | -4.301671 | 0.049080  |
| 41 | C | 4.775045  | -6.899061 | -0.335426 |
| 42 | C | 3.409667  | -5.347180 | 0.951417  |
| 43 | C | 3.951035  | -6.616068 | 0.762141  |
| 44 | C | 4.507013  | -4.586771 | -1.051777 |
| 45 | C | 5.042939  | -5.858699 | -1.235490 |
| 46 | C | 5.332970  | -8.284853 | -0.556863 |
| 47 | C | 7.366302  | 4.579882  | 0.316476  |
| 48 | C | 5.428773  | 3.798639  | -0.932964 |
| 49 | C | 6.457855  | 4.716382  | -0.741501 |
| 50 | C | 6.175881  | 2.568121  | 0.998708  |
| 51 | C | 7.201638  | 3.490082  | 1.183155  |
| 52 | C | 8.499016  | 5.560362  | 0.505331  |
| 53 | S | -2.219939 | -3.792223 | 0.135728  |
| 54 | S | 1.020655  | -1.303132 | 1.146399  |
| 55 | S | -1.020576 | 1.303060  | -1.146304 |
| 56 | S | 2.220036  | 3.792663  | -0.136605 |
| 57 | N | -3.406604 | 0.559999  | -0.079467 |
| 58 | N | 3.406619  | -0.559893 | 0.079217  |
| 59 | H | -6.309583 | 8.250226  | 1.052373  |
| 60 | H | -4.668109 | 8.883987  | 1.193009  |
| 61 | H | -5.451727 | 8.825317  | -0.388248 |
| 62 | H | -5.675093 | 6.049168  | 2.100033  |
| 63 | H | -4.714510 | 3.805126  | 1.776020  |



|    |   |           |           |           |
|----|---|-----------|-----------|-----------|
| 64 | H | -3.736691 | 7.399595  | -1.485924 |
| 65 | H | -2.790806 | 5.150601  | -1.822146 |
| 66 | H | -6.097371 | 2.536049  | -0.019201 |
| 67 | H | -6.668331 | -0.065168 | 0.248150  |
| 68 | H | -6.054810 | -1.749737 | -1.700476 |
| 69 | H | -7.881160 | -3.369859 | -2.023169 |
| 70 | H | -6.560698 | -5.551141 | 1.432474  |
| 71 | H | -4.753815 | -3.917236 | 1.776225  |
| 72 | H | -8.735116 | -5.702088 | -1.563546 |
| 73 | H | -9.415578 | -5.208222 | -0.011645 |
| 74 | H | -8.257138 | -6.539870 | -0.076185 |
| 75 | H | -2.001726 | -0.355203 | 1.430696  |
| 76 | H | 0.929966  | -4.744260 | -0.164728 |
| 77 | H | 2.790438  | -5.150427 | 1.821689  |
| 78 | H | 3.736079  | -7.399529 | 1.485598  |
| 79 | H | 5.450938  | -8.825536 | 0.388103  |
| 80 | H | 4.667717  | -8.883992 | -1.193365 |
| 81 | H | 6.309255  | -8.250488 | -1.052246 |
| 82 | H | 5.675052  | -6.049374 | -2.100158 |
| 83 | H | 4.714722  | -3.805215 | -1.776263 |
| 84 | H | 6.097498  | -2.535873 | 0.018604  |
| 85 | H | 6.668242  | 0.065474  | -0.248598 |
| 86 | H | 6.054092  | 1.749144  | 1.700828  |
| 87 | H | 7.880599  | 3.368911  | 2.024478  |
| 88 | H | 4.754598  | 3.917624  | -1.775837 |
| 89 | H | 6.561585  | 5.551191  | -1.431094 |
| 90 | H | 8.257665  | 6.539335  | 0.078346  |
| 91 | H | 9.415929  | 5.207539  | 0.013887  |
| 92 | H | 8.735046  | 5.701141  | 1.565681  |
| 93 | H | -0.929885 | 4.744678  | 0.163750  |
| 94 | H | 2.001651  | 0.355187  | -1.430539 |

**Computational Details: Cartesian Coordinates of DFT- optimized Structure of 6**

| <u>No</u> | <u>Atom</u> | <u>X</u>  | <u>Y</u>  | <u>Z</u>  |
|-----------|-------------|-----------|-----------|-----------|
| 1         | S           | 1.249400  | -1.075677 | -1.252233 |
| 2         | S           | -1.533753 | -3.969321 | -0.008429 |
| 3         | N           | 3.549490  | 0.004420  | -0.068964 |
| 4         | C           | 2.179210  | -2.419128 | -0.539283 |
| 5         | C           | 1.317739  | -3.484453 | -0.177998 |
| 6         | H           | 1.683862  | -4.373643 | 0.312266  |
| 7         | C           | -0.016409 | -3.205438 | -0.419908 |
| 8         | C           | -2.446162 | -2.527038 | -0.578447 |
| 9         | C           | -1.567248 | -1.587125 | -1.146715 |
| 10        | H           | -1.921825 | -0.647209 | -1.533682 |
| 11        | C           | -0.239941 | -1.949481 | -1.035307 |
| 12        | C           | 3.580009  | -2.364788 | -0.321383 |
| 13        | C           | 4.274328  | -1.119930 | -0.246610 |
| 14        | C           | 5.708738  | -0.778862 | -0.189258 |
| 15        | C           | 6.914052  | -1.461693 | -0.596351 |
| 16        | C           | 6.903447  | -2.632623 | -1.385872 |
| 17        | H           | 5.958280  | -3.067471 | -1.670629 |
| 18        | C           | 8.071649  | -3.210646 | -1.835997 |
| 19        | H           | 8.029559  | -4.102753 | -2.450580 |
| 20        | C           | 9.306741  | -2.629237 | -1.518314 |
| 21        | H           | 10.228479 | -3.072968 | -1.877621 |
| 22        | C           | 9.345738  | -1.468840 | -0.772289 |
| 23        | H           | 10.306016 | -1.009207 | -0.579210 |
| 24        | C           | 8.168622  | -0.851090 | -0.297795 |
| 25        | C           | 8.206935  | 0.392732  | 0.464345  |
| 26        | C           | 9.409701  | 0.900231  | 1.001123  |
| 27        | H           | 10.331685 | 0.351725  | 0.860388  |
| 28        | C           | 9.439879  | 2.064020  | 1.742293  |
| 29        | H           | 10.378718 | 2.421888  | 2.149845  |

|    |   |           |           |           |
|----|---|-----------|-----------|-----------|
| 30 | C | 8.249608  | 2.760578  | 1.992449  |
| 31 | H | 8.258908  | 3.656666  | 2.602595  |
| 32 | C | 7.057922  | 2.291095  | 1.481627  |
| 33 | H | 6.143765  | 2.81416   | 1.714691  |
| 34 | C | 7.001415  | 1.120068  | 0.694075  |
| 35 | C | 5.762483  | 0.556576  | 0.212463  |
| 36 | C | 4.369864  | 1.043371  | 0.185855  |
| 37 | C | 4.252868  | -3.642401 | 0.026859  |
| 38 | C | 4.105760  | -4.789734 | -0.766342 |
| 39 | H | 3.513268  | -4.736378 | -1.672606 |
| 40 | C | 4.733478  | -5.982812 | -0.422789 |
| 41 | H | 4.614445  | -6.850113 | -1.064276 |
| 42 | C | 5.518449  | -6.082439 | 0.729503  |
| 43 | C | 5.655039  | -4.940086 | 1.527315  |
| 44 | H | 6.254331  | -4.988463 | 2.431035  |
| 45 | C | 5.039200  | -3.743887 | 1.185226  |
| 46 | H | 5.158117  | -2.876233 | 1.822963  |
| 47 | C | 6.193094  | -7.376731 | 1.111592  |
| 48 | H | 7.264442  | -7.230674 | 1.277504  |
| 49 | H | 6.072779  | -8.133662 | 0.334178  |
| 50 | H | 5.774700  | -7.781378 | 2.038989  |
| 51 | C | -3.821710 | -2.364616 | -0.292945 |
| 52 | C | -4.615461 | -3.552678 | 0.096034  |
| 53 | C | -4.561415 | -4.747364 | -0.638434 |
| 54 | H | -3.960354 | -4.793696 | -1.539023 |
| 55 | C | -5.298208 | -5.861019 | -0.249105 |
| 56 | H | -5.245678 | -6.766979 | -0.844253 |
| 57 | C | -6.108866 | -5.831374 | 0.888678  |
| 58 | C | -6.155200 | -4.642333 | 1.627268  |
| 59 | H | -6.768871 | -4.592369 | 2.521240  |
| 60 | C | -5.427964 | -3.525789 | 1.241950  |
| 61 | H | -5.473635 | -2.622039 | 1.837293  |
| 62 | C | -6.916569 | -7.033264 | 1.311141  |

|    |   |            |           |           |
|----|---|------------|-----------|-----------|
| 63 | H | -6.693243  | -7.317286 | 2.343900  |
| 64 | H | -6.712516  | -7.895567 | 0.673612  |
| 65 | H | -7.989834  | -6.823879 | 1.258801  |
| 66 | S | -1.249398  | 1.075646  | 1.252279  |
| 67 | S | 1.533751   | 3.969292  | 0.008481  |
| 68 | N | -3.549486  | -0.004453 | 0.068972  |
| 69 | C | -2.179207  | 2.419097  | 0.539332  |
| 70 | C | -1.317743  | 3.484428  | 0.178063  |
| 71 | H | -1.683868  | 4.373623  | -0.312191 |
| 72 | C | 0.016409   | 3.205409  | 0.419963  |
| 73 | C | 2.446161   | 2.527005  | 0.578481  |
| 74 | C | 1.567254   | 1.587090  | 1.146749  |
| 75 | H | 1.921832   | 0.647171  | 1.533707  |
| 76 | C | 0.239943   | 1.949447  | 1.035349  |
| 77 | C | -3.580008  | 2.364755  | 0.321424  |
| 78 | C | -4.274322  | 1.119905  | 0.246608  |
| 79 | C | -5.708731  | 0.778857  | 0.189178  |
| 80 | C | -6.914051  | 1.461719  | 0.596194  |
| 81 | C | -6.903457  | 2.632677  | 1.385675  |
| 82 | H | -5.958292  | 3.067519  | 1.670451  |
| 83 | C | -8.071667  | 3.210733  | 1.835734  |
| 84 | H | -8.029589  | 4.102860  | 2.450288  |
| 85 | C | -9.306757  | 2.629332  | 1.518019  |
| 86 | H | -10.228502 | 3.073091  | 1.877273  |
| 87 | C | -9.345742  | 1.468915  | 0.772025  |
| 88 | H | -10.306021 | 1.009295  | 0.578917  |
| 89 | C | -8.168617  | 0.851132  | 0.297597  |
| 90 | C | -8.206917  | -0.392703 | -0.464525 |
| 91 | C | -9.409668  | -0.900187 | -1.001350 |
| 92 | H | -10.331650 | -0.351666 | -0.860659 |
| 93 | C | -9.439831  | -2.063979 | -1.742517 |
| 94 | H | -10.378658 | -2.421834 | -2.150108 |
| 95 | C | -8.249559  | -2.760553 | -1.992621 |

|     |   |           |           |           |
|-----|---|-----------|-----------|-----------|
| 96  | H | -8.258846 | -3.656642 | -2.602767 |
| 97  | C | -7.057889 | -2.291086 | -1.481751 |
| 98  | H | -6.143729 | -2.814163 | -1.714777 |
| 99  | C | -7.001397 | -1.120059 | -0.694198 |
| 100 | C | -5.762476 | -0.556583 | -0.212534 |
| 101 | C | -4.369861 | -1.043391 | -0.185868 |
| 102 | C | -4.252877 | 3.642378  | -0.026764 |
| 103 | C | -4.105752 | 4.789686  | 0.766471  |
| 104 | H | -3.513235 | 4.736303  | 1.672717  |
| 105 | C | -4.733484 | 5.982771  | 0.422971  |
| 106 | H | -4.614437 | 6.850053  | 1.064482  |
| 107 | C | -5.518485 | 6.082432  | -0.729298 |
| 108 | C | -5.655093 | 4.940103  | -1.527142 |
| 109 | H | -6.254411 | 4.988506  | -2.430843 |
| 110 | C | -5.039241 | 3.743896  | -1.185106 |
| 111 | H | -5.158173 | 2.876261  | -1.822866 |
| 112 | C | -6.193140 | 7.376735  | -1.111331 |
| 113 | H | -7.264481 | 7.230674  | -1.277275 |
| 114 | H | -6.072851 | 8.133626  | -0.333873 |
| 115 | H | -5.774730 | 7.781439  | -2.038697 |
| 116 | C | 3.821710  | 2.364586  | 0.292965  |
| 117 | C | 4.615460  | 3.552660  | -0.095978 |
| 118 | C | 4.561409  | 4.747326  | 0.638524  |
| 119 | H | 3.960342  | 4.793631  | 1.539110  |
| 120 | C | 5.298205  | 5.860992  | 0.249231  |
| 121 | H | 5.245672  | 6.766900  | 0.844406  |
| 122 | C | 6.108870  | 5.831379  | -0.888547 |
| 123 | C | 6.155210  | 4.642359  | -1.627171 |
| 124 | H | 6.768888  | 4.592420  | -2.521140 |
| 125 | C | 5.427972  | 3.525804  | -1.241890 |
| 126 | H | 5.473647  | 2.622070  | -1.837257 |
| 127 | C | 6.916567  | 7.033284  | -1.310978 |
| 128 | H | 6.693144  | 7.317411  | -2.343687 |

|     |    |          |          |           |
|-----|----|----------|----------|-----------|
| 129 | H  | 6.712603 | 7.895534 | -0.673348 |
| 130 | H  | 7.989831 | 6.823863 | -1.258768 |
| 131 | Bq | 0        | 0        | 0         |

**Computational Details: Cartesian Coordinates of DFT- optimized Structure of 7**

| <u>No</u> | <u>Atom</u> | <u>X</u>  | <u>Y</u>  | <u>Z</u>  |
|-----------|-------------|-----------|-----------|-----------|
| 1         | C           | 1.329571  | -3.610466 | -0.446323 |
| 2         | C           | -0.016363 | -3.309795 | -0.607764 |
| 3         | C           | 2.171356  | -2.466969 | -0.612878 |
| 4         | C           | -0.237601 | -1.952669 | -0.995100 |
| 5         | C           | -2.443325 | -2.573040 | -0.587121 |
| 6         | C           | -1.559386 | -1.568191 | -1.029313 |
| 7         | C           | 0.237559  | 1.952128  | 0.995188  |
| 8         | C           | 2.443298  | 2.572335  | 0.587255  |
| 9         | C           | 0.016441  | 3.309325  | 0.608236  |
| 10        | C           | -2.171311 | 2.466622  | 0.612923  |
| 11        | C           | -1.329521 | 3.610097  | 0.446740  |
| 12        | C           | -4.303896 | -1.068632 | -0.015976 |
| 13        | C           | -4.223792 | 1.164344  | 0.232098  |
| 14        | C           | -5.684085 | -0.586879 | -0.042119 |
| 15        | C           | -5.632778 | 0.810777  | 0.104173  |
| 16        | C           | -7.084861 | -0.999685 | -0.234031 |
| 17        | C           | -7.002220 | 1.349335  | 0.080829  |
| 18        | C           | -7.840636 | 0.210878  | -0.136612 |
| 19        | C           | -7.770633 | -2.175719 | -0.474231 |
| 20        | C           | -9.189602 | -2.132002 | -0.603195 |
| 21        | C           | -9.233074 | 0.274693  | -0.243760 |
| 22        | C           | -9.911653 | -0.957578 | -0.488516 |
| 23        | C           | -7.606115 | 2.584793  | 0.221458  |
| 24        | C           | -9.026120 | 2.671011  | 0.131241  |

|    |   |           |           |           |
|----|---|-----------|-----------|-----------|
| 25 | C | -9.825751 | 1.565867  | -0.099125 |
| 26 | C | 4.223825  | -1.164501 | -0.232659 |
| 27 | C | 4.304131  | 1.068489  | 0.015325  |
| 28 | C | 5.632907  | -0.810948 | -0.105575 |
| 29 | C | 5.684425  | 0.586713  | 0.040515  |
| 30 | C | 7.002274  | -1.349678 | -0.083273 |
| 31 | C | 7.085486  | 0.999410  | 0.230963  |
| 32 | C | 7.841011  | -0.211293 | 0.133197  |
| 33 | C | 7.605864  | -2.585241 | -0.224319 |
| 34 | C | 9.025933  | -2.671639 | -0.135464 |
| 35 | C | 9.233567  | -0.275260 | 0.238807  |
| 36 | C | 9.825927  | -1.566537 | 0.093858  |
| 37 | C | 9.912614  | 0.957021  | 0.482188  |
| 38 | C | 9.190877  | 2.131614  | 0.596987  |
| 39 | C | 7.771764  | 2.175466  | 0.469661  |
| 40 | C | 3.563031  | -2.406597 | -0.382101 |
| 41 | C | 4.648850  | 3.564585  | -0.034024 |
| 42 | C | -3.563009 | 2.406311  | 0.381850  |
| 43 | C | -3.795369 | -2.382667 | -0.233331 |
| 44 | C | -4.649046 | -3.564479 | 0.035557  |
| 45 | C | -6.232959 | -5.841013 | 0.595713  |
| 46 | C | -4.766708 | -4.604352 | -0.902015 |
| 47 | C | -5.553456 | -5.722703 | -0.623863 |
| 48 | C | -5.335828 | -3.678992 | 1.258377  |
| 49 | C | -6.110750 | -4.801211 | 1.531876  |
| 50 | C | -7.072738 | -7.065156 | 0.911342  |
| 51 | C | -4.294965 | 3.687446  | 0.173107  |
| 52 | C | -4.426769 | 4.618960  | 1.214278  |
| 53 | C | -5.104723 | 5.820711  | 1.006712  |
| 54 | C | -4.847569 | 3.992744  | -1.080822 |
| 55 | C | -5.513476 | 5.199985  | -1.284637 |
| 56 | C | -5.653725 | 6.131789  | -0.245406 |
| 57 | C | 5.335456  | 3.681345  | -1.255793 |

|    |   |            |           |           |
|----|---|------------|-----------|-----------|
| 58 | C | 6.112486   | 4.803840  | -1.526273 |
| 59 | C | 6.235548   | 5.840570  | -0.588191 |
| 60 | C | 5.556417   | 5.719301  | 0.632411  |
| 61 | C | 4.768281   | 4.602072  | 0.907076  |
| 62 | C | 7.062353   | 7.074064  | -0.901103 |
| 63 | C | 4.295077   | -3.687653 | -0.173206 |
| 64 | C | 5.654039   | -6.131861 | 0.245530  |
| 65 | C | 5.514239   | -5.199713 | 1.284500  |
| 66 | C | 4.848211   | -3.992546 | 1.080578  |
| 67 | C | 5.104512   | -5.821181 | -1.006476 |
| 68 | C | 4.426499   | -4.619496 | -1.214150 |
| 69 | C | 6.359570   | -7.455367 | 0.480717  |
| 70 | S | 1.225370   | -1.022702 | -1.041348 |
| 71 | S | -1.550025  | -4.114646 | -0.308086 |
| 72 | S | -1.225441  | 1.022240  | 1.041186  |
| 73 | S | 1.550184   | 4.114065  | 0.308638  |
| 74 | N | 3.477134   | -0.013430 | -0.174870 |
| 75 | N | -3.477026  | 0.013162  | 0.174650  |
| 76 | H | 1.731386   | -4.566747 | -0.147980 |
| 77 | H | -1.912967  | -0.573675 | -1.231073 |
| 78 | H | -4.257234  | -4.520555 | -1.854774 |
| 79 | H | -5.644164  | -6.510992 | -1.363325 |
| 80 | H | -7.166095  | -7.713176 | 0.034801  |
| 81 | H | -6.614165  | -7.648655 | 1.719356  |
| 82 | H | -8.079051  | -6.776402 | 1.235992  |
| 83 | H | -6.627962  | -4.875915 | 2.482681  |
| 84 | H | -5.247838  | -2.882916 | 1.987405  |
| 85 | H | -7.255702  | -3.121936 | -0.560688 |
| 86 | H | -9.715074  | -3.060938 | -0.793803 |
| 87 | H | -10.991892 | -0.965738 | -0.586112 |
| 88 | H | -10.902888 | 1.673095  | -0.168627 |
| 89 | H | -9.488138  | 3.645218  | 0.244639  |
| 90 | H | -7.026466  | 3.480796  | 0.391290  |



|     |    |           |           |           |
|-----|----|-----------|-----------|-----------|
| 91  | H  | -4.752237 | 3.278141  | -1.889312 |
| 92  | H  | -5.933452 | 5.421484  | -2.260114 |
| 93  | H  | -5.211158 | 6.524501  | 1.825437  |
| 94  | H  | -4.008766 | 4.387976  | 2.186941  |
| 95  | H  | -5.663622 | 8.190977  | -0.904421 |
| 96  | H  | 5.650194  | 6.504346  | 1.375132  |
| 97  | H  | 4.260092  | 4.515026  | 1.860236  |
| 98  | H  | 6.631666  | 4.879437  | -2.475739 |
| 99  | H  | 5.248167  | 2.886674  | -1.986437 |
| 100 | H  | 6.471526  | 7.792565  | -1.484066 |
| 101 | H  | 7.949487  | 6.814296  | -1.488137 |
| 102 | H  | 7.387849  | 7.572417  | 0.017378  |
| 103 | H  | 9.716658  | 3.060659  | 0.786167  |
| 104 | H  | 7.257312  | 3.121940  | 0.555826  |
| 105 | H  | 10.992974 | 0.965077  | 0.578453  |
| 106 | H  | 10.903126 | -1.673869 | 0.162235  |
| 107 | H  | 9.487717  | -3.645924 | -0.249150 |
| 108 | H  | 7.025932  | -3.481176 | -0.393526 |
| 109 | H  | 7.189622  | -7.338173 | 1.185156  |
| 110 | H  | 6.754579  | -7.861591 | -0.455742 |
| 111 | H  | 5.662783  | -8.192098 | 0.901185  |
| 112 | H  | 5.934652  | -5.420880 | 2.259863  |
| 113 | H  | 4.753217  | -3.277688 | 1.888884  |
| 114 | H  | 5.210662  | -6.525200 | -1.825044 |
| 115 | H  | 4.008151  | -4.388796 | -2.186731 |
| 116 | H  | 1.912885  | 0.572879  | 1.230604  |
| 117 | H  | -1.731262 | 4.566478  | 0.148610  |
| 118 | C  | 3.795469  | 2.382201  | 0.233417  |
| 119 | C  | 1.559370  | 1.567480  | 1.029156  |
| 120 | C  | -6.359375 | 7.455259  | -0.480516 |
| 121 | H  | -7.191726 | 7.337255  | -1.182126 |
| 122 | H  | -6.751269 | 7.863155  | 0.456518  |
| 123 | Bq | 0         | 0         | 0         |
